# Supplementary material for: A Co-Association Network Analysis Reveals Putative Regulators for Health-Related Traits in Pigs
Source: Front Immunol. 2021 Nov 26;12:784978. doi: 10.3389/fimmu.2021.784978 (PMC8662732; doi:10.3389/fimmu.2021.784978)
Supplement: Supplementary file 5 [file Table_4.xlsx]

## Sheet: GO_BiologicalProcess
GOID	GOTerm	Ontology Source	Term PValue	Term PValue Corrected with Bonferroni step down	Group PValue	Group PValue Corrected with Bonferroni step down	GOLevels	GOGroups	% Associated Genes	Nr. Genes	Associated Genes Found
GO:0000165	MAPK cascade	GO_BiologicalProcess-EBI-UniProt-GOA-ACAP-ARAP_02.03.2021_00h00	0.0705757	1	0.718025	1	[4, 5, 6]	Group125	8.78244	88	[ANGPT1, ARHGEF6, ARRB1, AVP, BANK1, BTRC, CAMK2A, CAVIN3, CCR1, CCR7, CD36, CD4, CLEC7A, CNKSR3, DAG1, DMD, DOK5, DUSP10, DUSP14, DUSP4, EPHA4, EPHB1, ERBB4, FAM83D, FASN, FGF13, FGF3, FGFR2, FNTA, FRS2, GDF6, GFRA4, GRB2, GREM1, GRM1, KRAS, KSR1, MAGI3, MAP2K4, MAP3K4, MAP4K3, MAPK4, MBP, MEF2A, MPP2, NTRK2, NTRK3, OPRM1, PAK1, PAQR3, PDGFRB, PKHD1, PPEF2, PPM1L, PPP3CA, PRDM11, PRKCE, PRKG2, P…
GO:0001817	regulation of cytokine production	GO_BiologicalProcess-EBI-UniProt-GOA-ACAP-ARAP_02.03.2021_00h00	0.235297	1	8.59526e-05	0.0097986	[3, 4, 5, 6]	Group122	6.19469	49	[ANGPT1, ARRB1, ATF2, BANK1, CCDC88B, CCR7, CD36, CD4, CD47, CD83, CDH3, CHIA, CLEC7A, CLNK, CNTN1, DDX3X, F11R, FRMD8, GPAM, GPATCH3, HDAC9, IL12RB2, IL17B, IL23R, IL4R, KAT2A, LAPTM4B, LRRC32, MAGI1, MAVS, MBP, MMP12, N4BP1, NLRX1, NPLOC4, PDE4B, POLR3A, POLR3H, PRKDC, PTPN6, PTPRC, RFTN1, RNF216, SERPINE1, SOS1, TRIM25, UBE2J1, VTCN1, XRCC6]
GO:0001819	positive regulation of cytokine production	GO_BiologicalProcess-EBI-UniProt-GOA-ACAP-ARAP_02.03.2021_00h00	0.199394	1	0.155428	1	[3, 4, 5, 6, 7]	Group080	5.76923	30	[ATF2, CCDC88B, CCR7, CD36, CD4, CD83, CHIA, CLEC7A, CLNK, CNTN1, DDX3X, FRMD8, IL12RB2, IL17B, IL23R, IL4R, KAT2A, MAVS, MBP, MMP12, PDE4B, POLR3A, POLR3H, PRKDC, PTPRC, RFTN1, SERPINE1, SOS1, VTCN1, XRCC6]
GO:0002253	activation of immune response	GO_BiologicalProcess-EBI-UniProt-GOA-ACAP-ARAP_02.03.2021_00h00	0.0425144	1	8.59526e-05	0.0097986	[2, 4, 5, 6]	Group122	5.24642	33	[ACTG1, BTRC, C1RL, CCR7, CD4, CD47, CD59, CFP, DOCK1, ELMO2, GRB2, KLRD1, KRAS, MAVS, NCOR2, PAK1, PDE4B, PLCL2, PLPP4, PRKCE, PRKDC, PROS1, PSMB2, PSMB6, PSMB9, PTPN6, PTPRC, RFTN1, SUSD4, TRBC1, VTCN1, WASL, XRCC6]
GO:0002274	myeloid leukocyte activation	GO_BiologicalProcess-EBI-UniProt-GOA-ACAP-ARAP_02.03.2021_00h00	0.0413272	1	8.59526e-05	0.0097986	[3, 4]	Group122	5.37931	39	[AGL, ARSB, ATP11A, CCT2, CCT8, CD36, CD47, CD59, CFP, CLEC5A, CLNK, CPPED1, DDX3X, DEGS1, DLC1, DYSF, FUCA2, GAB2, GYG1, HAVCR1, HVCN1, IL4R, IST1, KCMF1, LAMP2, MMP12, NDUFC2, PRKCE, PTPN6, PTPRB, PTPRC, RAB37, RCAN1, ROCK1, SCAMP1, STXBP1, SUCNR1, TADA2A, XRCC6]
GO:0002275	myeloid cell activation involved in immune response	GO_BiologicalProcess-EBI-UniProt-GOA-ACAP-ARAP_02.03.2021_00h00	0.305436	1	8.59526e-05	0.0097986	[4, 5]	Group122	6.18893	38	[AGL, ARSB, ATP11A, CCT2, CCT8, CD36, CD47, CD59, CFP, CLEC5A, CLNK, CPPED1, DDX3X, DEGS1, DLC1, DYSF, FUCA2, GAB2, GYG1, HVCN1, IL4R, IST1, KCMF1, LAMP2, MMP12, NDUFC2, PRKCE, PTPN6, PTPRB, PTPRC, RAB37, RCAN1, ROCK1, SCAMP1, STXBP1, SUCNR1, TADA2A, XRCC6]
GO:0002283	neutrophil activation involved in immune response	GO_BiologicalProcess-EBI-UniProt-GOA-ACAP-ARAP_02.03.2021_00h00	0.155109	1	8.59526e-05	0.0097986	[5, 6, 7]	Group122	5.69853	31	[AGL, ARSB, ATP11A, CCT2, CCT8, CD36, CD47, CD59, CFP, CLEC5A, CPPED1, DDX3X, DEGS1, DLC1, FUCA2, GYG1, HVCN1, IST1, KCMF1, LAMP2, MMP12, NDUFC2, PTPN6, PTPRB, PTPRC, RAB37, RCAN1, ROCK1, SCAMP1, TADA2A, XRCC6]
GO:0002366	leukocyte activation involved in immune response	GO_BiologicalProcess-EBI-UniProt-GOA-ACAP-ARAP_02.03.2021_00h00	0.184935	1	8.59526e-05	0.0097986	[3, 4]	Group122	6.05296	48	[AGL, ARSB, ATP11A, CCT2, CCT8, CD36, CD47, CD59, CFP, CLEC5A, CLEC7A, CLNK, CPPED1, DDX3X, DEGS1, DLC1, DOCK10, DYSF, ENTPD7, FUCA2, GAB2, GYG1, HVCN1, IFNE, IFNW1, IL23R, IL4R, IST1, ITFG2, KCMF1, LAMP2, MAD2L2, MMP12, NDUFC2, PLCL2, PRKCE, PTPN6, PTPRB, PTPRC, RAB37, RCAN1, ROCK1, SCAMP1, STXBP1, SUCNR1, TADA2A, TSC1, XRCC6]
GO:0002429	immune response-activating cell surface receptor signaling pathway	GO_BiologicalProcess-EBI-UniProt-GOA-ACAP-ARAP_02.03.2021_00h00	0.0213005	1	8.59526e-05	0.0097986	[4, 5, 6, 7, 8]	Group122	4.77099	25	[ACTG1, BTRC, CCR7, CD4, CD47, DOCK1, ELMO2, GRB2, KLRD1, KRAS, NCOR2, PAK1, PDE4B, PLCL2, PLPP4, PRKCE, PSMB2, PSMB6, PSMB9, PTPN6, PTPRC, RFTN1, TRBC1, VTCN1, WASL]
GO:0002443	leukocyte mediated immunity	GO_BiologicalProcess-EBI-UniProt-GOA-ACAP-ARAP_02.03.2021_00h00	0.00676579	1	8.59526e-05	0.0097986	[3]	Group122	5.17241	51	[AGL, ARSB, ATP11A, C1RL, CCT2, CCT8, CD36, CD47, CD59, CFP, CLEC5A, CLEC7A, CLNK, CPPED1, DDX3X, DEGS1, DLC1, EPHB6, FBXO38, FUCA2, GAB2, GYG1, HVCN1, IL23R, IL4R, IL7R, IST1, KCMF1, KLRD1, KLRK1, LAMP2, MAD2L2, MAVS, MMP12, NDUFC2, PLEKHM2, PNKD, PTPN6, PTPRB, PTPRC, RAB37, RCAN1, RFTN1, RNF19B, ROCK1, SCAMP1, STXBP1, SUSD4, TADA2A, TRBC1, XRCC6]
GO:0002444	myeloid leukocyte mediated immunity	GO_BiologicalProcess-EBI-UniProt-GOA-ACAP-ARAP_02.03.2021_00h00	0.157289	1	8.59526e-05	0.0097986	[4]	Group122	5.82524	36	[AGL, ARSB, ATP11A, CCT2, CCT8, CD36, CD47, CD59, CFP, CLEC5A, CLNK, CPPED1, DDX3X, DEGS1, DLC1, FUCA2, GAB2, GYG1, HVCN1, IL4R, IST1, KCMF1, LAMP2, MAVS, MMP12, NDUFC2, PTPN6, PTPRB, PTPRC, RAB37, RCAN1, ROCK1, SCAMP1, STXBP1, TADA2A, XRCC6]
GO:0002446	neutrophil mediated immunity	GO_BiologicalProcess-EBI-UniProt-GOA-ACAP-ARAP_02.03.2021_00h00	0.115951	1	8.59526e-05	0.0097986	[5]	Group122	5.58559	31	[AGL, ARSB, ATP11A, CCT2, CCT8, CD36, CD47, CD59, CFP, CLEC5A, CPPED1, DDX3X, DEGS1, DLC1, FUCA2, GYG1, HVCN1, IST1, KCMF1, LAMP2, MMP12, NDUFC2, PTPN6, PTPRB, PTPRC, RAB37, RCAN1, ROCK1, SCAMP1, TADA2A, XRCC6]
GO:0002520	immune system development	GO_BiologicalProcess-EBI-UniProt-GOA-ACAP-ARAP_02.03.2021_00h00	1	1	8.59526e-05	0.0097986	[2, 4, 5]	Group122	7.26257	78	[ADD1, ANGPT1, CCR1, CCR7, CD4, CD83, CDKN1A, COMMD3-BMI1, CSRP3, DOCK1, DOCK10, DUSP10, EML1, ENTPD7, EPAS1, ESCO2, ETV6, FASN, FGFR2, FOXN1, GAB2, GFI1B, GPC3, HDAC9, IFNE, IFNW1, IL23R, IL4R, IL7R, ITFG2, ITGA2B, JARID2, KAT2A, KMT2C, LDB2, LRP5, LRRK1, LYAR, MAD2L2, MEIS1, MYH9, MYSM1, NHEJ1, NKAP, PARP1, PGM3, PLCL2, PNKD, POLB, PPARGC1B, PRKDC, PSMB2, PSMB6, PSMB9, PTPN6, PTPRC, PURB, RBFOX…
GO:0002521	leukocyte differentiation	GO_BiologicalProcess-EBI-UniProt-GOA-ACAP-ARAP_02.03.2021_00h00	0.935231	1	8.59526e-05	0.0097986	[4, 5, 6, 7, 8]	Group122	7.10572	41	[CCR1, CCR7, CD4, CD83, CDKN1A, DOCK10, DUSP10, ENTPD7, FASN, FOXN1, GAB2, GPC3, HDAC9, IFNE, IFNW1, IL23R, IL4R, IL7R, ITFG2, KAT2A, LRRK1, MYH9, NHEJ1, NKAP, PARP1, PLCL2, PNKD, PPARGC1B, PRKDC, PTPN6, PTPRC, RUNX2, RUNX3, SH3PXD2A, SOS1, SP3, SPINK5, TMEM131L, TSC1, TYRO3, XRCC6]
GO:0002682	regulation of immune system process	GO_BiologicalProcess-EBI-UniProt-GOA-ACAP-ARAP_02.03.2021_00h00	0.0885647	1	8.59526e-05	0.0097986	[2, 3]	Group122	6.34226	116	[ACTG1, ADCY2, ADCY8, ADCYAP1R1, ANGPT1, AVP, BANK1, BPNT1, BTRC, C1RL, CCDC88B, CCR1, CCR7, CD300LD, CD36, CD4, CD47, CD59, CD83, CDKN1A, CFP, CLEC7A, CLNK, CNOT7, COL1A1, CXADR, DHX15, DLG5, DOCK1, DOCK8, DUSP10, ELMO2, ENTPD7, EPHB6, FBXO38, FGL1, FOXN1, GAB2, GFI1B, GLP2R, GPAM, GPATCH3, GPR83, GRB2, GREM1, HAVCR1, HTR4, IL23R, IL4R, IL7R, ITGA2B, KAT2A, KLRD1, KLRK1, KMT2C, KRAS, LDB2, LRRC3…
GO:0002683	negative regulation of immune system process	GO_BiologicalProcess-EBI-UniProt-GOA-ACAP-ARAP_02.03.2021_00h00	0.876033	1	8.59526e-05	0.0097986	[2, 3, 4]	Group122	7.48408	47	[ADCY2, ADCY8, ADCYAP1R1, ANGPT1, AVP, BANK1, CD47, CD59, CLNK, CNOT7, DHX15, DLG5, DUSP10, FGL1, GLP2R, GPAM, GPATCH3, GPR83, GREM1, HTR4, IL4R, IL7R, KLRD1, KLRK1, LRRC32, LYAR, MMP12, MYH9, NLRX1, NPLOC4, OTOP1, PLCL2, PRKDC, PTPN6, PTPRC, RIN3, RUNX3, RXFP1, SPINK5, SUSD4, TKFC, TMBIM6, TMEM131L, TYRO3, VIPR2, VTCN1, WASL]
GO:0002684	positive regulation of immune system process	GO_BiologicalProcess-EBI-UniProt-GOA-ACAP-ARAP_02.03.2021_00h00	0.00616734	1	8.59526e-05	0.0097986	[2, 3, 4]	Group122	5.33104	62	[ACTG1, BTRC, C1RL, CCDC88B, CCR1, CCR7, CD36, CD4, CD47, CD59, CD83, CDKN1A, CFP, CLEC7A, CLNK, DOCK1, DOCK8, DUSP10, ELMO2, EPHB6, FBXO38, GAB2, GPAM, GRB2, HAVCR1, IL23R, IL4R, IL7R, ITGA2B, KLRD1, KLRK1, KRAS, MAD2L2, MAVS, MMP12, NCOR2, NKAP, P2RY12, PAK1, PDE4B, PLCL2, PLPP4, PNKD, PPARGC1B, PRKCE, PRKDC, PROS1, PSMB2, PSMB6, PSMB9, PTPN6, PTPRC, RFTN1, RUNX3, SERPINE1, STXBP1, SUSD4, TRBC1…
GO:0002694	regulation of leukocyte activation	GO_BiologicalProcess-EBI-UniProt-GOA-ACAP-ARAP_02.03.2021_00h00	0.356822	1	8.59526e-05	0.0097986	[3, 4, 5]	Group122	6.32716	41	[BANK1, CCDC88B, CCR7, CD4, CD47, CD83, CDKN1A, CLEC7A, CLNK, DLG5, DOCK8, DUSP10, EPHB6, FGL1, FOXN1, GAB2, GPAM, GRB2, HAVCR1, IL23R, IL4R, IL7R, KAT2A, KLRK1, LRRC32, MAD2L2, NKAP, PAK1, PRKDC, PTPN6, PTPRC, RUNX3, SOS1, SPINK5, STXBP1, TMEM131L, TRBC1, TYRO3, VTCN1, XRCC6, ZNF335]
GO:0002696	positive regulation of leukocyte activation	GO_BiologicalProcess-EBI-UniProt-GOA-ACAP-ARAP_02.03.2021_00h00	0.712363	1	8.59526e-05	0.0097986	[3, 4, 5, 6]	Group122	6.77201	30	[CCDC88B, CCR7, CD4, CD47, CD83, CDKN1A, CLEC7A, DOCK8, DUSP10, EPHB6, GAB2, GPAM, GRB2, HAVCR1, IL23R, IL4R, IL7R, KLRK1, MAD2L2, NKAP, PAK1, PRKDC, PTPN6, PTPRC, RUNX3, STXBP1, TRBC1, VTCN1, XRCC6, ZNF335]
GO:0002697	regulation of immune effector process	GO_BiologicalProcess-EBI-UniProt-GOA-ACAP-ARAP_02.03.2021_00h00	0.491303	1	8.59526e-05	0.0097986	[3, 4]	Group122	6.44531	33	[ANGPT1, CD36, CD47, CD59, CFP, CLEC7A, CLNK, DUSP10, FBXO38, GAB2, GPATCH3, IL23R, IL4R, IL7R, KLRD1, KLRK1, MAD2L2, MAVS, MMP12, NLRX1, NPLOC4, PNKD, PRKDC, PROS1, PTPN6, PTPRC, RNF216, SPINK5, STXBP1, SUSD4, TKFC, TMBIM6, TRIM44]
GO:0002757	immune response-activating signal transduction	GO_BiologicalProcess-EBI-UniProt-GOA-ACAP-ARAP_02.03.2021_00h00	0.0213005	1	8.59526e-05	0.0097986	[3, 4, 5, 6, 7]	Group122	4.77099	25	[ACTG1, BTRC, CCR7, CD4, CD47, DOCK1, ELMO2, GRB2, KLRD1, KRAS, NCOR2, PAK1, PDE4B, PLCL2, PLPP4, PRKCE, PSMB2, PSMB6, PSMB9, PTPN6, PTPRC, RFTN1, TRBC1, VTCN1, WASL]
GO:0002764	immune response-regulating signaling pathway	GO_BiologicalProcess-EBI-UniProt-GOA-ACAP-ARAP_02.03.2021_00h00	0.0477571	1	8.59526e-05	0.0097986	[3, 4, 5]	Group122	5.17857	29	[ACTG1, BTRC, CCR7, CD4, CD47, DOCK1, ELMO2, GAB2, GRB2, KLRD1, KRAS, MAP2K4, NCOR2, PAK1, PDE4B, PLCL2, PLPP4, PPP3CA, PRKCE, PSMB2, PSMB6, PSMB9, PTPN6, PTPRC, RFTN1, SOS1, TRBC1, VTCN1, WASL]
GO:0002768	immune response-regulating cell surface receptor signaling pathway	GO_BiologicalProcess-EBI-UniProt-GOA-ACAP-ARAP_02.03.2021_00h00	0.0568433	1	8.59526e-05	0.0097986	[4, 5, 6]	Group122	5.20646	29	[ACTG1, BTRC, CCR7, CD4, CD47, DOCK1, ELMO2, GAB2, GRB2, KLRD1, KRAS, MAP2K4, NCOR2, PAK1, PDE4B, PLCL2, PLPP4, PPP3CA, PRKCE, PSMB2, PSMB6, PSMB9, PTPN6, PTPRC, RFTN1, SOS1, TRBC1, VTCN1, WASL]
GO:0004674	protein serine/threonine kinase activity	GO_BiologicalProcess-EBI-UniProt-GOA-ACAP-ARAP_02.03.2021_00h00	0.793499	1	0.718025	1	[8, 9, 10]	Group125	7.52212	68	[AKT2, APC, ARRB1, ATR, BMP2K, CAMK2A, CAMK2G, CCND3, CDC42BPA, CDKN1A, CEMIP, CHORDC1, CIT, CSNK1A1, DDX3X, DUSP10, DUSP14, DUSP4, ENG, EPHA4, FGF13, FRS2, GRK7, GRM1, KRAS, KSR1, LRP5, LRRK1, MAP2K4, MAP3K4, MAP4K3, MAPK4, MARK1, NTRK3, OBSCN, PAK1, PAQR3, PDGFRB, PDIK1L, PPEF2, PRKAA2, PRKCE, PRKDC, PRKG1, PRKG2, PRPF4B, PTPN6, PTPRC, RALB, RAPGEF2, RET, ROCK1, RPS6KA2, SGK2, SH2B3, SOS1, SPAG…
GO:0004707	MAP kinase activity	GO_BiologicalProcess-EBI-UniProt-GOA-ACAP-ARAP_02.03.2021_00h00	0.687157	1	0.718025	1	[5, 6, 7, 9, 10, 11]	Group125	7.81671	29	[ARRB1, DUSP10, DUSP14, DUSP4, EPHA4, FGF13, FRS2, GRM1, KRAS, KSR1, MAP2K4, MAP3K4, MAP4K3, MAPK4, NTRK3, PAK1, PAQR3, PDGFRB, PPEF2, PTPN6, PTPRC, RET, SH2B3, SOS1, SPAG9, TAOK1, TIAM1, TPD52L1, WNT7B]
GO:0006909	phagocytosis	GO_BiologicalProcess-EBI-UniProt-GOA-ACAP-ARAP_02.03.2021_00h00	0.395567	1	0.0702918	1	[3, 5]	Group087	6.13208	26	[ACTG1, ARHGAP12, CD36, CD47, CLEC7A, DOCK1, DYSF, ELMO2, GRB2, HAVCR1, LYAR, MSR1, MYH9, MYO7A, NCF4, PAK1, PLPP4, PRKCE, PTPRC, SCARB1, SRPX, SYT7, TAFA4, TRBC1, TYRO3, WASL]
GO:0006952	defense response	GO_BiologicalProcess-EBI-UniProt-GOA-ACAP-ARAP_02.03.2021_00h00	0.00429638	1	8.59526e-05	0.0097986	[3]	Group122	5.79208	117	[ABCC1, ABCC2, ADAMTS13, ADCY2, ADCY8, ADCYAP1R1, ADORA3, AGBL4, ATRN, AVP, BTRC, C1RL, CALCOCO2, CAMK2A, CAMK2G, CCDC88B, CCR1, CCR7, CD36, CD4, CD47, CD83, CERS6, CFP, CHIA, CLEC5A, CLEC7A, CLNK, CNOT7, CNTN1, CSRP3, CYBC1, DDX3X, DHX15, DLC1, DUOX2, DUOXA2, DUSP10, EPHB6, ESR1, F11R, FOLR2, FOSL1, FOXN1, GABRA5, GLP2R, GPAM, GPATCH3, GPR83, HDAC9, HTR4, IFNE, IFNW1, IL10RB, IL17B, IL23R, IL4R,…
GO:0006954	inflammatory response	GO_BiologicalProcess-EBI-UniProt-GOA-ACAP-ARAP_02.03.2021_00h00	0.0080032	1	8.59526e-05	0.0097986	[4]	Group122	5.19878	51	[ABCC1, ABCC2, ADCY2, ADCY8, ADCYAP1R1, ADORA3, ATRN, AVP, CCR1, CCR7, CD36, CD47, CERS6, CHIA, CLEC7A, CNTN1, CSRP3, DHX15, DLC1, DUOXA2, DUSP10, EPHB6, ESR1, F11R, FOLR2, GLP2R, GPR83, HDAC9, HTR4, IL10RB, IL17B, IL23R, IL4R, MAGI1, MSMP, MYH9, NAPEPLD, NLRX1, OPRM1, PIK3AP1, POLB, PTGFR, PTPRC, RXFP1, SERPINE1, SOS1, SPP1, SUCNR1, TYRO3, VIPR2, ZYX]
GO:0006979	response to oxidative stress	GO_BiologicalProcess-EBI-UniProt-GOA-ACAP-ARAP_02.03.2021_00h00	0.333825	1	0.592964	1	[3]	Group042	6.12245	30	[ABCC2, ATRN, CCR7, CCS, CD36, COL1A1, DLC1, DUOX2, EPAS1, FOSL1, GCLM, MTR, NCF4, NDUFS8, NEIL1, PARP1, PDGFRB, PPARGC1B, PRKAA2, PRR5L, RCAN1, SGK2, SOS1, STK26, SZT2, TAT, TRPC6, TSC1, TXN2, UCP2]
GO:0007159	leukocyte cell-cell adhesion	GO_BiologicalProcess-EBI-UniProt-GOA-ACAP-ARAP_02.03.2021_00h00	0.920372	1	8.59526e-05	0.0097986	[4]	Group122	7.42706	28	[CCDC88B, CCR7, CD4, CD47, CD83, DLG5, DOCK8, DUSP10, EPHB6, F11R, FGL1, GPAM, GRB2, IL23R, IL4R, IL7R, KLRK1, LRRC32, NKAP, PAK1, PTPN6, PTPRC, ROCK1, RUNX3, SEMA4D, SLC39A8, TMEM131L, VTCN1]
GO:0007596	blood coagulation	GO_BiologicalProcess-EBI-UniProt-GOA-ACAP-ARAP_02.03.2021_00h00	0.0443109	1	0.0100666	0.815397	[3, 5]	Group055	10.1333	38	[ABAT, ACTG1, ADAMTS13, AK4, ARRB1, CD36, CD59, CNTN1, COL1A1, DGKB, DGKH, DGKI, DOCK1, DOCK9, F10, F11R, GNA12, GNAQ, HGFAC, ITGA2B, ITPR2, JMJD1C, MMRN1, MYH9, MYL12A, P2RY12, PRKCE, PRKG1, PROS1, PTPN6, RAD51B, SERPINE1, SH2B3, STXBP1, TRPC6, TYRO3, VPS45, VWF]
GO:0009617	response to bacterium	GO_BiologicalProcess-EBI-UniProt-GOA-ACAP-ARAP_02.03.2021_00h00	0.00214968	1	8.59526e-05	0.0097986	[3, 5]	Group122	4.64824	37	[ABCC2, ADAMTS13, ADGRL2, BAIAP2L1, BANK1, CCR7, CD36, CD4, CFP, DGKB, DLC1, DUSP10, FGFR2, FUCA2, GPC3, GPM6A, IFNE, IL23R, IL7R, KMO, LOXL1, MAOB, MAVS, NCOR2, NOS1, OPRM1, PDE4B, PNKD, PRKCE, PTGFR, SCARB1, SERPINE1, SPINK5, TJP1, TRBC1, WASL, WDR35]
GO:0016032	viral process	GO_BiologicalProcess-EBI-UniProt-GOA-ACAP-ARAP_02.03.2021_00h00	0.0210173	1	0.0210173	1	[3]	Group032	5.55033	59	[ALYREF, AP1S3, ATG16L2, BTRC, CALCOCO2, CD4, CHMP6, CLEC5A, CNOT7, CXADR, DAG1, DDX3X, EEA1, EIF3B, F11R, GRB2, HAVCR1, IST1, KAT2A, KPNA3, LNX1, MAGI3, MAVS, MGAT5, MORC3, N4BP1, NDC1, NECTIN4, NLRX1, NPC1, NTRK3, NUP54, NUP85, PAAF1, PC, PSMB2, PSMB6, PSMB9, PTPRC, RAB1B, RBBP7, RNF216, RSF1, SCARB1, SEPTIN6, SND1, ST6GALNAC3, TOP1, TRIM25, TRIM62, TUSC3, TYRO3, USP6NL, VPS37A, VPS37C, WWP2, X…
GO:0019058	viral life cycle	GO_BiologicalProcess-EBI-UniProt-GOA-ACAP-ARAP_02.03.2021_00h00	0.695663	1	0.0210173	1	[4]	Group032	7.8481	31	[ATG16L2, CD4, CHMP6, CLEC5A, CNOT7, CXADR, DAG1, DDX3X, EEA1, F11R, HAVCR1, IST1, KPNA3, MAVS, N4BP1, NDC1, NECTIN4, NPC1, NUP54, NUP85, PC, RAB1B, RBBP7, SCARB1, TRIM25, TRIM62, TYRO3, USP6NL, VPS37A, VPS37C, WWP2]
GO:0030097	hemopoiesis	GO_BiologicalProcess-EBI-UniProt-GOA-ACAP-ARAP_02.03.2021_00h00	0.949396	1	8.59526e-05	0.0097986	[4, 5, 6, 7]	Group122	7.35751	71	[ADD1, ANGPT1, CCR1, CCR7, CD4, CD83, CDKN1A, COMMD3-BMI1, DOCK1, DOCK10, DUSP10, EML1, ENTPD7, EPAS1, ESCO2, ETV6, FASN, FGFR2, FOXN1, GAB2, GFI1B, GPC3, HDAC9, IFNE, IFNW1, IL23R, IL4R, IL7R, ITFG2, ITGA2B, KAT2A, KMT2C, LDB2, LRRK1, LYAR, MEIS1, MYH9, MYSM1, NHEJ1, NKAP, PARP1, PGM3, PLCL2, PNKD, PPARGC1B, PRKDC, PSMB2, PSMB6, PSMB9, PTPN6, PTPRC, PURB, RBFOX2, RUNX2, RUNX3, SCIN, SH2B3, SH3PX…
GO:0030098	lymphocyte differentiation	GO_BiologicalProcess-EBI-UniProt-GOA-ACAP-ARAP_02.03.2021_00h00	0.622922	1	8.59526e-05	0.0097986	[4, 5, 6, 7, 8, 9, 10]	Group122	7.94872	31	[CCR7, CD4, CD83, DOCK10, DUSP10, ENTPD7, FOXN1, HDAC9, IFNE, IFNW1, IL23R, IL4R, IL7R, ITFG2, KAT2A, NHEJ1, NKAP, PLCL2, PNKD, PRKDC, PTPN6, PTPRC, RUNX2, RUNX3, SOS1, SP3, SPINK5, TMEM131L, TSC1, TYRO3, XRCC6]
GO:0030099	myeloid cell differentiation	GO_BiologicalProcess-EBI-UniProt-GOA-ACAP-ARAP_02.03.2021_00h00	0.521638	1	8.59526e-05	0.0097986	[4, 5, 6, 7, 8]	Group122	6.44444	29	[ADD1, CCR1, CCR7, CD4, CDKN1A, EPAS1, FASN, GAB2, GPC3, IL23R, ITGA2B, KMT2C, LDB2, LRRK1, LYAR, MEIS1, MYH9, PARP1, PPARGC1B, PRKDC, PTPN6, PURB, RBFOX2, SCIN, SH2B3, SH3PXD2A, SP3, TNRC6B, TNRC6C]
GO:0031347	regulation of defense response	GO_BiologicalProcess-EBI-UniProt-GOA-ACAP-ARAP_02.03.2021_00h00	0.100253	1	8.59526e-05	0.0097986	[4, 5]	Group122	5.902	53	[ABCC1, ADCY2, ADCY8, ADCYAP1R1, AVP, BTRC, CCR7, CD47, CLNK, CNOT7, DHX15, DUOXA2, DUSP10, ESR1, GLP2R, GPATCH3, GPR83, HTR4, IL23R, KLRD1, KLRK1, KRAS, LYAR, MAGI1, MAVS, MMP12, MYH9, N4BP1, NAPEPLD, NLRX1, NPLOC4, OTOP1, PAK1, PIK3AP1, PRKDC, PSMB2, PSMB6, PSMB9, PTPN6, PTPRC, RNF216, RXFP1, SERPINE1, SOS1, SPINK5, SUCNR1, SUSD4, TKFC, TRIM44, TYRO3, VIPR2, XRCC6, ZYX]
GO:0031348	negative regulation of defense response	GO_BiologicalProcess-EBI-UniProt-GOA-ACAP-ARAP_02.03.2021_00h00	0.396248	1	8.59526e-05	0.0097986	[3, 4, 5, 6]	Group122	6.10329	26	[ADCY2, ADCY8, ADCYAP1R1, AVP, CNOT7, DHX15, DUSP10, GLP2R, GPATCH3, GPR83, HTR4, KLRD1, LYAR, MMP12, MYH9, NLRX1, NPLOC4, OTOP1, PTPRC, RXFP1, SOS1, SPINK5, SUSD4, TKFC, TYRO3, VIPR2]
GO:0033554	cellular response to stress	GO_BiologicalProcess-EBI-UniProt-GOA-ACAP-ARAP_02.03.2021_00h00	0.861987	1	8.59526e-05	0.0097986	[3]	Group122	7.4224	165	[AATF, ADCY8, ADD1, AGR2, AIFM1, AK4, ANKS4B, ANO1, APBB1, APC, ARHGEF6, ARMT1, ATF2, ATP6V1A, ATR, BAG3, BTRC, C12orf49, CAMK2A, CAMK2G, CAPN3, CCR7, CCS, CD36, CDKN1A, CDKN2AIP, CFTR, CHORDC1, CLEC16A, CLEC7A, CNOT7, DAG1, DCLRE1A, DCLRE1B, DDX3X, DNAJB6, DNAJC2, DONSON, DUSP10, ECPAS, EMSY, EPAS1, EPHA4, EPHB1, ERCC4, ESCO2, EYA2, FAM168A, FANCM, FASN, FBXO31, FKBP4, FOLR2, FOXN3, FTO, GDF6, G…
GO:0034097	response to cytokine	GO_BiologicalProcess-EBI-UniProt-GOA-ACAP-ARAP_02.03.2021_00h00	0.0940149	1	8.59526e-05	0.0097986	[4]	Group122	6.13208	78	[ABCC2, ABCG4, ADAMTS13, ADAMTS7, ADIPOR1, AKAP6, ANGPT1, ARID5B, BBS2, BTRC, CALCOCO2, CAMK2A, CAMK2G, CCR1, CCR7, CD36, CD4, CD47, CDKN1A, CNOT7, CNTFR, CNTN1, COL1A1, DOCK8, DUOX2, EFHC2, FASN, FGF13, FOSL1, GAB2, GCLM, GFRA4, GRB2, IFNE, IFNW1, IL10RB, IL12RB2, IL23R, IL4R, IL7R, JARID2, KAT2A, KDM5B, KMO, KRAS, LIFR, MAP4K3, MAVS, MMP12, NFYB, NUB1, OPRM1, OTOP1, PAX6, PMM1, PSMB2, PSMB6, PS…
GO:0042110	T cell activation	GO_BiologicalProcess-EBI-UniProt-GOA-ACAP-ARAP_02.03.2021_00h00	0.346012	1	8.59526e-05	0.0097986	[4, 5]	Group122	8.34951	43	[CCDC88B, CCND3, CCR7, CD4, CD47, CD83, CLEC7A, CTPS1, CXADR, DLG5, DOCK8, DUSP10, ENTPD7, EPHB6, FGL1, FOXN1, GPAM, GRB2, IFNE, IFNW1, IL23R, IL4R, IL7R, KAT2A, KLRK1, LRRC32, MYH9, NHEJ1, NKAP, PAK1, PNKD, PPP3CA, PRKDC, PTPN6, PTPRC, RUNX2, RUNX3, SOS1, SP3, SPINK5, TMEM131L, TSC1, VTCN1]
GO:0042119	neutrophil activation	GO_BiologicalProcess-EBI-UniProt-GOA-ACAP-ARAP_02.03.2021_00h00	0.115951	1	8.59526e-05	0.0097986	[5, 6]	Group122	5.58559	31	[AGL, ARSB, ATP11A, CCT2, CCT8, CD36, CD47, CD59, CFP, CLEC5A, CPPED1, DDX3X, DEGS1, DLC1, FUCA2, GYG1, HVCN1, IST1, KCMF1, LAMP2, MMP12, NDUFC2, PTPN6, PTPRB, PTPRC, RAB37, RCAN1, ROCK1, SCAMP1, TADA2A, XRCC6]
GO:0043299	leukocyte degranulation	GO_BiologicalProcess-EBI-UniProt-GOA-ACAP-ARAP_02.03.2021_00h00	0.174689	1	8.59526e-05	0.0097986	[3, 4, 5, 6, 7, 8]	Group122	5.87248	35	[AGL, ARSB, ATP11A, CCT2, CCT8, CD36, CD47, CD59, CFP, CLEC5A, CLNK, CPPED1, DDX3X, DEGS1, DLC1, FUCA2, GAB2, GYG1, HVCN1, IL4R, IST1, KCMF1, LAMP2, MMP12, NDUFC2, PTPN6, PTPRB, PTPRC, RAB37, RCAN1, ROCK1, SCAMP1, STXBP1, TADA2A, XRCC6]
GO:0043312	neutrophil degranulation	GO_BiologicalProcess-EBI-UniProt-GOA-ACAP-ARAP_02.03.2021_00h00	0.178682	1	8.59526e-05	0.0097986	[4, 5, 6, 7, 8, 9]	Group122	5.75139	31	[AGL, ARSB, ATP11A, CCT2, CCT8, CD36, CD47, CD59, CFP, CLEC5A, CPPED1, DDX3X, DEGS1, DLC1, FUCA2, GYG1, HVCN1, IST1, KCMF1, LAMP2, MMP12, NDUFC2, PTPN6, PTPRB, PTPRC, RAB37, RCAN1, ROCK1, SCAMP1, TADA2A, XRCC6]
GO:0043436	oxoacid metabolic process	GO_BiologicalProcess-EBI-UniProt-GOA-ACAP-ARAP_02.03.2021_00h00	0.0215309	1	0.0139009	1	[4]	Group111	9.09091	103	[AACS, AARS2, ABAT, ABCC1, ABCC2, ABCD3, ACACA, ACAD10, ACCS, ACO1, ACO2, ACOT11, ACSF2, ACSL3, ACSL5, ADIPOR1, ADSL, AIG1, AKT2, ALDH1A3, ASAH2B, ASPA, AUH, AVP, BCAT1, BPHL, BPNT1, CD36, CRYM, CTNS, CTPS1, CTPS2, CYP7B1, DEGS1, DPYD, ELOVL4, ELOVL5, FA2H, FARSB, FASN, FOLH1B, FOLR2, FOXK2, GART, GCLM, GPAM, HADH, HAO2, HIBCH, HSD17B12, IDH3G, INSIG2, KMO, LARS2, LIPI, LONP2, LPIN1, MDH1, ME1, M…
GO:0043491	protein kinase B signaling	GO_BiologicalProcess-EBI-UniProt-GOA-ACAP-ARAP_02.03.2021_00h00	0.000153542	0.1127	0.718025	1	[4, 5, 6]	Group125	13.8182	38	[AKT2, ANGPT1, BANK1, CAVIN3, CCR7, CNTN1, DAG1, ENG, ERBB4, ESR1, F10, FGF13, FGF3, FGFR2, FRS2, GAB2, GRB2, MAGI2, MTM1, NTRK2, NTRK3, P2RY12, PDGFRB, PHLPP2, PIK3AP1, PKHD1, RCAN3, RET, SEMA5A, SH2B3, SLC9A3R1, SOS1, STK3, TCF7L2, TNFAIP8L3, TXN2, TYRO3]
GO:0045087	innate immune response	GO_BiologicalProcess-EBI-UniProt-GOA-ACAP-ARAP_02.03.2021_00h00	0.000871809	0.617241	8.59526e-05	0.0097986	[3, 4, 5, 6]	Group122	4.84171	52	[ADAMTS13, BTRC, C1RL, CALCOCO2, CAMK2A, CAMK2G, CD47, CFP, CLEC5A, CLEC7A, CLNK, CNOT7, CYBC1, DDX3X, DUSP10, IL23R, KLRD1, KLRK1, KRAS, LYAR, MAVS, MMP12, N4BP1, NLRX1, NUB1, OTOP1, PAK1, PLEKHM2, PNKD, POLR3A, POLR3H, PRKDC, PSMB2, PSMB6, PSMB9, PTPN6, RNF19B, STX8, STXBP1, SUSD4, TKFC, TRBC1, TRIM25, TRIM62, TRIM64B, TRIM77, TTC4, TYRO3, UNC93B1, XRCC6, ZYX]
GO:0045321	leukocyte activation	GO_BiologicalProcess-EBI-UniProt-GOA-ACAP-ARAP_02.03.2021_00h00	0.113292	1	8.59526e-05	0.0097986	[2, 3]	Group122	6.27178	90	[AGL, ARSB, ATP11A, BANK1, CCDC88B, CCND3, CCR7, CCT2, CCT8, CD36, CD4, CD47, CD59, CD83, CDKN1A, CFP, CLEC5A, CLEC7A, CLNK, CPPED1, CTPS1, CXADR, DDX3X, DEGS1, DLC1, DLG5, DOCK10, DOCK8, DUSP10, DYSF, ENTPD7, EPHB1, EPHB6, FGL1, FOXN1, FUCA2, GAB2, GPAM, GRB2, GYG1, HAVCR1, HDAC9, HVCN1, IFNE, IFNW1, IL23R, IL4R, IL7R, IST1, ITFG2, KAT2A, KCMF1, KLRK1, LAMP2, LRRC32, MAD2L2, MMP12, MYH9, NDUFC2,…
GO:0046649	lymphocyte activation	GO_BiologicalProcess-EBI-UniProt-GOA-ACAP-ARAP_02.03.2021_00h00	0.681975	1	8.59526e-05	0.0097986	[3, 4]	Group122	6.88406	57	[BANK1, CCDC88B, CCND3, CCR7, CD4, CD47, CD83, CDKN1A, CLEC7A, CLNK, CTPS1, CXADR, DLG5, DOCK10, DOCK8, DUSP10, ENTPD7, EPHB1, EPHB6, FGL1, FOXN1, GPAM, GRB2, HDAC9, IFNE, IFNW1, IL23R, IL4R, IL7R, ITFG2, KAT2A, KLRK1, LRRC32, MAD2L2, MYH9, NHEJ1, NKAP, PAK1, PLCL2, PNKD, PPP3CA, PRKDC, PTPN6, PTPRC, RUNX2, RUNX3, SNX27, SOS1, SP3, SPINK5, TMEM131L, TRBC1, TSC1, TYRO3, VTCN1, XRCC6, ZNF335]
GO:0048534	hematopoietic or lymphoid organ development	GO_BiologicalProcess-EBI-UniProt-GOA-ACAP-ARAP_02.03.2021_00h00	0.663431	1	8.59526e-05	0.0097986	[3, 4, 5, 6]	Group122	7.64647	77	[ADD1, ANGPT1, CCR1, CCR7, CD4, CD83, CDKN1A, COMMD3-BMI1, CSRP3, DOCK1, DOCK10, DUSP10, EML1, ENTPD7, EPAS1, ESCO2, ETV6, FASN, FGFR2, FOXN1, GAB2, GFI1B, GPC3, HDAC9, IFNE, IFNW1, IL23R, IL4R, IL7R, ITFG2, ITGA2B, JARID2, KAT2A, KMT2C, LDB2, LRP5, LRRK1, LYAR, MEIS1, MYH9, MYSM1, NHEJ1, NKAP, PARP1, PGM3, PLCL2, PNKD, POLB, PPARGC1B, PRKDC, PSMB2, PSMB6, PSMB9, PTPN6, PTPRC, PURB, RBFOX2, RET, …
GO:0050727	regulation of inflammatory response	GO_BiologicalProcess-EBI-UniProt-GOA-ACAP-ARAP_02.03.2021_00h00	0.02061	1	8.59526e-05	0.0097986	[4, 5, 6]	Group122	4.83005	27	[ABCC1, ADCY2, ADCY8, ADCYAP1R1, AVP, CCR7, CD47, DHX15, DUOXA2, DUSP10, ESR1, GLP2R, GPR83, HTR4, MAGI1, MYH9, NAPEPLD, NLRX1, PIK3AP1, PTPRC, RXFP1, SERPINE1, SOS1, SUCNR1, TYRO3, VIPR2, ZYX]
GO:0050776	regulation of immune response	GO_BiologicalProcess-EBI-UniProt-GOA-ACAP-ARAP_02.03.2021_00h00	0.095945	1	8.59526e-05	0.0097986	[3, 4]	Group122	6.09349	73	[ACTG1, ADCY2, ADCY8, ADCYAP1R1, AVP, BTRC, C1RL, CCR7, CD300LD, CD4, CD47, CD59, CFP, CLNK, CNOT7, COL1A1, CXADR, DHX15, DOCK1, DUSP10, ELMO2, ENTPD7, FBXO38, FGL1, GAB2, GLP2R, GPR83, GRB2, HTR4, IL23R, IL4R, IL7R, KLRD1, KLRK1, KRAS, LYAR, MAD2L2, MAP2K4, MAVS, MMP12, MYH9, N4BP1, NCOR2, NLRX1, OTOP1, PAK1, PDE4B, PIANP, PLCL2, PLPP4, PNKD, PPP3CA, PRKCE, PRKDC, PROS1, PSMB2, PSMB6, PSMB9, PTP…
GO:0050778	positive regulation of immune response	GO_BiologicalProcess-EBI-UniProt-GOA-ACAP-ARAP_02.03.2021_00h00	0.0139503	1	8.59526e-05	0.0097986	[3, 4, 5]	Group122	5.17449	43	[ACTG1, BTRC, C1RL, CCR7, CD4, CD47, CD59, CFP, CLNK, DOCK1, ELMO2, FBXO38, GAB2, GRB2, IL23R, IL4R, KLRD1, KLRK1, KRAS, MAD2L2, MAVS, MMP12, NCOR2, PAK1, PDE4B, PLCL2, PLPP4, PNKD, PRKCE, PRKDC, PROS1, PSMB2, PSMB6, PSMB9, PTPN6, PTPRC, RFTN1, STXBP1, SUSD4, TRBC1, VTCN1, WASL, XRCC6]
GO:0050863	regulation of T cell activation	GO_BiologicalProcess-EBI-UniProt-GOA-ACAP-ARAP_02.03.2021_00h00	0.606123	1	8.59526e-05	0.0097986	[5, 6, 7]	Group122	7.95455	28	[CCDC88B, CCR7, CD4, CD47, CD83, DLG5, DOCK8, DUSP10, EPHB6, FGL1, FOXN1, GPAM, GRB2, IL23R, IL4R, IL7R, KAT2A, KLRK1, LRRC32, NKAP, PAK1, PTPN6, PTPRC, RUNX3, SOS1, SPINK5, TMEM131L, VTCN1]
GO:0050900	leukocyte migration	GO_BiologicalProcess-EBI-UniProt-GOA-ACAP-ARAP_02.03.2021_00h00	0.319362	1	0.000152481	0.0166204	[2, 4, 5]	Group108	6.1706	34	[ANGPT1, CCR1, CCR7, CD300H, CD47, COL1A1, CXADR, CYP7B1, DOCK8, EPCAM, F11R, FOLR2, GPC1, GRB2, GREM1, ITGA2B, KLRK1, MSMP, MTUS1, MYH9, NUP85, P2RY12, PDE4B, PROS1, PTPN6, RET, RIN3, ROCK1, SERPINE1, SLC12A2, SOS1, TAFA4, UMODL1, WASL]
GO:0051249	regulation of lymphocyte activation	GO_BiologicalProcess-EBI-UniProt-GOA-ACAP-ARAP_02.03.2021_00h00	0.740685	1	8.59526e-05	0.0097986	[4, 5, 6]	Group122	6.83453	38	[BANK1, CCDC88B, CCR7, CD4, CD47, CD83, CDKN1A, CLEC7A, CLNK, DLG5, DOCK8, DUSP10, EPHB6, FGL1, FOXN1, GPAM, GRB2, IL23R, IL4R, IL7R, KAT2A, KLRK1, LRRC32, MAD2L2, NKAP, PAK1, PRKDC, PTPN6, PTPRC, RUNX3, SOS1, SPINK5, TMEM131L, TRBC1, TYRO3, VTCN1, XRCC6, ZNF335]
GO:0051251	positive regulation of lymphocyte activation	GO_BiologicalProcess-EBI-UniProt-GOA-ACAP-ARAP_02.03.2021_00h00	0.770109	1	8.59526e-05	0.0097986	[4, 5, 6, 7]	Group122	6.81818	27	[CCDC88B, CCR7, CD4, CD47, CD83, CDKN1A, CLEC7A, DOCK8, DUSP10, EPHB6, GPAM, GRB2, IL23R, IL4R, IL7R, KLRK1, MAD2L2, NKAP, PAK1, PRKDC, PTPN6, PTPRC, RUNX3, TRBC1, VTCN1, XRCC6, ZNF335]
GO:0051707	response to other organism	GO_BiologicalProcess-EBI-UniProt-GOA-ACAP-ARAP_02.03.2021_00h00	0.0124989	1	8.59526e-05	0.0097986	[2, 4]	Group122	5.84416	99	[ABCC2, ADAMTS13, ADGRL2, AGBL4, BAIAP2L1, BANK1, BTRC, C1RL, CALCOCO2, CAMK2A, CAMK2G, CCDC88B, CCR7, CD36, CD4, CD47, CFP, CLEC5A, CLEC7A, CLNK, CNOT7, CYBC1, DDX3X, DGKB, DLC1, DUOX2, DUSP10, FGFR2, FOSL1, FUCA2, GPAM, GPATCH3, GPC3, GPM6A, IFNE, IFNW1, IL10RB, IL23R, IL4R, IL7R, KLRD1, KLRK1, KMO, KRAS, LOXL1, LYAR, MAOB, MAVS, MMP12, N4BP1, NCOR2, NLRX1, NOS1, NPLOC4, NUB1, ODC1, OPRM1, OTOP…
GO:0070371	ERK1 and ERK2 cascade	GO_BiologicalProcess-EBI-UniProt-GOA-ACAP-ARAP_02.03.2021_00h00	0.0917069	1	0.718025	1	[5, 6, 7]	Group125	9.73451	33	[ANGPT1, ARRB1, AVP, CAVIN3, CCR1, CCR7, CD36, CD4, CNKSR3, DMD, DUSP10, DUSP4, EPHB1, ERBB4, FAM83D, FGF13, FGFR2, FRS2, NTRK2, NTRK3, OPRM1, PDGFRB, PKHD1, PPP3CA, PTPN6, PTPRC, RAPGEF2, ROR1, SLC30A10, SLC9A3R1, TIAM1, TNFAIP8L3, WNK2]
GO:0071345	cellular response to cytokine stimulus	GO_BiologicalProcess-EBI-UniProt-GOA-ACAP-ARAP_02.03.2021_00h00	0.149248	1	0.0759635	1	[5]	Group113	6.26058	74	[ABCC2, ABCG4, ADAMTS13, ADAMTS7, ADIPOR1, AKAP6, ANGPT1, ARID5B, BBS2, BTRC, CAMK2A, CAMK2G, CCR1, CCR7, CD36, CD4, CD47, CDKN1A, CNOT7, CNTFR, CNTN1, COL1A1, DOCK8, DUOX2, EFHC2, FASN, FGF13, GAB2, GCLM, GFRA4, GRB2, IFNE, IFNW1, IL10RB, IL12RB2, IL23R, IL4R, IL7R, JARID2, KAT2A, KDM5B, KMO, KRAS, LIFR, MAVS, MMP12, NFYB, OPRM1, OTOP1, PAX6, PMM1, PSMB2, PSMB6, PSMB9, PTPN12, PTPN5, PTPN6, PTPR…
GO:0098542	defense response to other organism	GO_BiologicalProcess-EBI-UniProt-GOA-ACAP-ARAP_02.03.2021_00h00	0.00670587	1	8.59526e-05	0.0097986	[3, 4, 5]	Group122	5.46154	71	[ADAMTS13, AGBL4, BTRC, C1RL, CALCOCO2, CAMK2A, CAMK2G, CCDC88B, CD36, CD4, CD47, CFP, CLEC5A, CLEC7A, CLNK, CNOT7, CYBC1, DDX3X, DLC1, DUSP10, GPAM, GPATCH3, IFNE, IFNW1, IL10RB, IL23R, IL4R, IL7R, KLRD1, KLRK1, KRAS, LYAR, MAVS, MMP12, N4BP1, NLRX1, NPLOC4, NUB1, OTOP1, PAK1, PLEKHM2, PNKD, POLR3A, POLR3H, PRKDC, PSMB2, PSMB6, PSMB9, PTPN6, PTPRC, RNF19B, RNF216, SERPINE1, SPINK5, STX8, STXBP1,…
GO:0106310	protein serine kinase activity	GO_BiologicalProcess-EBI-UniProt-GOA-ACAP-ARAP_02.03.2021_00h00	0.232246	1	0.718025	1	[9, 10, 11]	Group125	8.92388	34	[AKT2, ATR, BMP2K, CAMK2A, CAMK2G, CDC42BPA, CIT, CSNK1A1, KSR1, LRRK1, MAP2K4, MAP3K4, MAP4K3, MAPK4, MARK1, OBSCN, PAK1, PDIK1L, PRKAA2, PRKCE, PRKDC, PRKG1, PRKG2, PRPF4B, ROCK1, RPS6KA2, SGK2, STK26, STK3, STK33, TAOK1, TESK2, TTK, WNK2]
GO:1903131	mononuclear cell differentiation	GO_BiologicalProcess-EBI-UniProt-GOA-ACAP-ARAP_02.03.2021_00h00	0.926556	1	8.59526e-05	0.0097986	[5, 6, 7, 8, 9]	Group122	7.41573	33	[CCR7, CD4, CD83, DOCK10, DUSP10, ENTPD7, FASN, FOXN1, HDAC9, IFNE, IFNW1, IL23R, IL4R, IL7R, ITFG2, KAT2A, MYH9, NHEJ1, NKAP, PLCL2, PNKD, PRKDC, PTPN6, PTPRC, RUNX2, RUNX3, SOS1, SP3, SPINK5, TMEM131L, TSC1, TYRO3, XRCC6]

## Sheet: GO_ImmuneSystemProcess
GOID	GOTerm	Ontology Source	Term PValue	Term PValue Corrected with Bonferroni step down	Group PValue	Group PValue Corrected with Bonferroni step down	GOLevels	GOGroups	% Associated Genes	Nr. Genes	Associated Genes Found
GO:0001909	leukocyte mediated cytotoxicity	GO_ImmuneSystemProcess-EBI-UniProt-GOA-ACAP-ARAP_02.03.2021_00h00	0.709889	1	0.39469	1	[3]	Group17	7.08661	9	[IL23R, IL7R, KLRD1, KLRK1, PLEKHM2, PNKD, PTPN6, PTPRC, RNF19B]
GO:0001910	regulation of leukocyte mediated cytotoxicity	GO_ImmuneSystemProcess-EBI-UniProt-GOA-ACAP-ARAP_02.03.2021_00h00	0.646724	1	0.39469	1	[4]	Group17	7.31707	6	[IL23R, IL7R, KLRD1, KLRK1, PNKD, PTPRC]
GO:0001912	positive regulation of leukocyte mediated cytotoxicity	GO_ImmuneSystemProcess-EBI-UniProt-GOA-ACAP-ARAP_02.03.2021_00h00	0.401687	1	0.39469	1	[4, 5]	Group17	8.92857	5	[IL23R, KLRD1, KLRK1, PNKD, PTPRC]
GO:0001913	T cell mediated cytotoxicity	GO_ImmuneSystemProcess-EBI-UniProt-GOA-ACAP-ARAP_02.03.2021_00h00	0.384719	1	0.39469	1	[4, 5]	Group17	9.43396	5	[IL23R, IL7R, KLRD1, PNKD, PTPRC]
GO:0001914	regulation of T cell mediated cytotoxicity	GO_ImmuneSystemProcess-EBI-UniProt-GOA-ACAP-ARAP_02.03.2021_00h00	0.0823107	1	0.39469	1	[5, 6]	Group17	13.5135	5	[IL23R, IL7R, KLRD1, PNKD, PTPRC]
GO:0002218	activation of innate immune response	GO_ImmuneSystemProcess-EBI-UniProt-GOA-ACAP-ARAP_02.03.2021_00h00	1	1	0.146952	1	[2, 4, 5]	Group16	6.32911	10	[BTRC, KLRD1, KRAS, MAVS, PAK1, PRKDC, PSMB2, PSMB6, PSMB9, XRCC6]
GO:0002220	innate immune response activating cell surface receptor signaling pathway	GO_ImmuneSystemProcess-EBI-UniProt-GOA-ACAP-ARAP_02.03.2021_00h00	0.853158	1	0.146952	1	[4, 6, 7]	Group16	5.6	7	[BTRC, KLRD1, KRAS, PAK1, PSMB2, PSMB6, PSMB9]
GO:0002223	stimulatory C-type lectin receptor signaling pathway	GO_ImmuneSystemProcess-EBI-UniProt-GOA-ACAP-ARAP_02.03.2021_00h00	1	1	0.146952	1	[5, 7, 8]	Group16	5.78512	7	[BTRC, KLRD1, KRAS, PAK1, PSMB2, PSMB6, PSMB9]
GO:0002228	natural killer cell mediated immunity	GO_ImmuneSystemProcess-EBI-UniProt-GOA-ACAP-ARAP_02.03.2021_00h00	0.46512	1	0.39469	1	[3, 4]	Group17	8.21918	6	[CLNK, KLRD1, KLRK1, PLEKHM2, PTPN6, RNF19B]
GO:0002244	hematopoietic progenitor cell differentiation	GO_ImmuneSystemProcess-EBI-UniProt-GOA-ACAP-ARAP_02.03.2021_00h00	0.635778	1	0.146952	1	[4]	Group16	7.26257	13	[DOCK1, EML1, ESCO2, LDB2, PRKDC, PSMB2, PSMB6, PSMB9, PTPN6, PTPRC, SOS1, SSBP3, TENT2]
GO:0002253	activation of immune response	GO_ImmuneSystemProcess-EBI-UniProt-GOA-ACAP-ARAP_02.03.2021_00h00	0.24176	1	0.146952	1	[1, 3, 4]	Group16	5.24642	33	[ACTG1, BTRC, C1RL, CCR7, CD4, CD47, CD59, CFP, DOCK1, ELMO2, GRB2, KLRD1, KRAS, MAVS, NCOR2, PAK1, PDE4B, PLCL2, PLPP4, PRKCE, PRKDC, PROS1, PSMB2, PSMB6, PSMB9, PTPN6, PTPRC, RFTN1, SUSD4, TRBC1, VTCN1, WASL, XRCC6]
GO:0002275	myeloid cell activation involved in immune response	GO_ImmuneSystemProcess-EBI-UniProt-GOA-ACAP-ARAP_02.03.2021_00h00	0.927658	1	0.683788	1	[3, 4]	Group13	6.18893	38	[AGL, ARSB, ATP11A, CCT2, CCT8, CD36, CD47, CD59, CFP, CLEC5A, CLNK, CPPED1, DDX3X, DEGS1, DLC1, DYSF, FUCA2, GAB2, GYG1, HVCN1, IL4R, IST1, KCMF1, LAMP2, MMP12, NDUFC2, PRKCE, PTPN6, PTPRB, PTPRC, RAB37, RCAN1, ROCK1, SCAMP1, STXBP1, SUCNR1, TADA2A, XRCC6]
GO:0002283	neutrophil activation involved in immune response	GO_ImmuneSystemProcess-EBI-UniProt-GOA-ACAP-ARAP_02.03.2021_00h00	0.566986	1	0.683788	1	[4, 5]	Group13	5.69853	31	[AGL, ARSB, ATP11A, CCT2, CCT8, CD36, CD47, CD59, CFP, CLEC5A, CPPED1, DDX3X, DEGS1, DLC1, FUCA2, GYG1, HVCN1, IST1, KCMF1, LAMP2, MMP12, NDUFC2, PTPN6, PTPRB, PTPRC, RAB37, RCAN1, ROCK1, SCAMP1, TADA2A, XRCC6]
GO:0002285	lymphocyte activation involved in immune response	GO_ImmuneSystemProcess-EBI-UniProt-GOA-ACAP-ARAP_02.03.2021_00h00	0.765288	1	0.384009	1	[3, 4]	Group15	5.47264	11	[DOCK10, ENTPD7, IFNE, IFNW1, IL23R, IL4R, ITFG2, MAD2L2, PLCL2, PTPRC, TSC1]
GO:0002286	T cell activation involved in immune response	GO_ImmuneSystemProcess-EBI-UniProt-GOA-ACAP-ARAP_02.03.2021_00h00	0.844525	1	0.384009	1	[4, 5]	Group15	5.26316	6	[ENTPD7, IFNE, IFNW1, IL23R, IL4R, TSC1]
GO:0002312	B cell activation involved in immune response	GO_ImmuneSystemProcess-EBI-UniProt-GOA-ACAP-ARAP_02.03.2021_00h00	1	1	0.384009	1	[4, 5]	Group15	5.74713	5	[DOCK10, ITFG2, MAD2L2, PLCL2, PTPRC]
GO:0002366	leukocyte activation involved in immune response	GO_ImmuneSystemProcess-EBI-UniProt-GOA-ACAP-ARAP_02.03.2021_00h00	0.741825	1	0.683788	1	[2, 3]	Group13	6.05296	48	[AGL, ARSB, ATP11A, CCT2, CCT8, CD36, CD47, CD59, CFP, CLEC5A, CLEC7A, CLNK, CPPED1, DDX3X, DEGS1, DLC1, DOCK10, DYSF, ENTPD7, FUCA2, GAB2, GYG1, HVCN1, IFNE, IFNW1, IL23R, IL4R, IST1, ITFG2, KCMF1, LAMP2, MAD2L2, MMP12, NDUFC2, PLCL2, PRKCE, PTPN6, PTPRB, PTPRC, RAB37, RCAN1, ROCK1, SCAMP1, STXBP1, SUCNR1, TADA2A, TSC1, XRCC6]
GO:0002429	immune response-activating cell surface receptor signaling pathway	GO_ImmuneSystemProcess-EBI-UniProt-GOA-ACAP-ARAP_02.03.2021_00h00	0.120723	1	0.146952	1	[3, 5, 6]	Group16	4.77099	25	[ACTG1, BTRC, CCR7, CD4, CD47, DOCK1, ELMO2, GRB2, KLRD1, KRAS, NCOR2, PAK1, PDE4B, PLCL2, PLPP4, PRKCE, PSMB2, PSMB6, PSMB9, PTPN6, PTPRC, RFTN1, TRBC1, VTCN1, WASL]
GO:0002431	Fc receptor mediated stimulatory signaling pathway	GO_ImmuneSystemProcess-EBI-UniProt-GOA-ACAP-ARAP_02.03.2021_00h00	1	1	0.146952	1	[4, 6, 7]	Group16	6.28931	10	[ACTG1, CD47, DOCK1, ELMO2, GRB2, PAK1, PLPP4, PRKCE, PTPRC, WASL]
GO:0002433	immune response-regulating cell surface receptor signaling pathway involved in phagocytosis	GO_ImmuneSystemProcess-EBI-UniProt-GOA-ACAP-ARAP_02.03.2021_00h00	0.865658	1	0.146952	1	[2, 5]	Group16	6.53595	10	[ACTG1, CD47, DOCK1, ELMO2, GRB2, PAK1, PLPP4, PRKCE, PTPRC, WASL]
GO:0002444	myeloid leukocyte mediated immunity	GO_ImmuneSystemProcess-EBI-UniProt-GOA-ACAP-ARAP_02.03.2021_00h00	0.587781	1	0.683788	1	[3]	Group13	5.82524	36	[AGL, ARSB, ATP11A, CCT2, CCT8, CD36, CD47, CD59, CFP, CLEC5A, CLNK, CPPED1, DDX3X, DEGS1, DLC1, FUCA2, GAB2, GYG1, HVCN1, IL4R, IST1, KCMF1, LAMP2, MAVS, MMP12, NDUFC2, PTPN6, PTPRB, PTPRC, RAB37, RCAN1, ROCK1, SCAMP1, STXBP1, TADA2A, XRCC6]
GO:0002446	neutrophil mediated immunity	GO_ImmuneSystemProcess-EBI-UniProt-GOA-ACAP-ARAP_02.03.2021_00h00	0.450362	1	0.683788	1	[4]	Group13	5.58559	31	[AGL, ARSB, ATP11A, CCT2, CCT8, CD36, CD47, CD59, CFP, CLEC5A, CPPED1, DDX3X, DEGS1, DLC1, FUCA2, GYG1, HVCN1, IST1, KCMF1, LAMP2, MMP12, NDUFC2, PTPN6, PTPRB, PTPRC, RAB37, RCAN1, ROCK1, SCAMP1, TADA2A, XRCC6]
GO:0002449	lymphocyte mediated immunity	GO_ImmuneSystemProcess-EBI-UniProt-GOA-ACAP-ARAP_02.03.2021_00h00	0.104394	1	0.39469	1	[3]	Group17	4.4665	18	[C1RL, CLNK, EPHB6, FBXO38, IL23R, IL4R, IL7R, KLRD1, KLRK1, MAD2L2, PLEKHM2, PNKD, PTPN6, PTPRC, RFTN1, RNF19B, SUSD4, TRBC1]
GO:0002456	T cell mediated immunity	GO_ImmuneSystemProcess-EBI-UniProt-GOA-ACAP-ARAP_02.03.2021_00h00	0.699248	1	0.39469	1	[4]	Group17	6.95652	8	[EPHB6, FBXO38, IL23R, IL7R, KLRD1, PNKD, PTPRC, RFTN1]
GO:0002460	adaptive immune response based on somatic recombination of immune receptors built from immunoglobulin superfamily domains	GO_ImmuneSystemProcess-EBI-UniProt-GOA-ACAP-ARAP_02.03.2021_00h00	0.0526078	1	0.39469	1	[3]	Group17	4.15648	17	[BACH2, C1RL, CD4, ENTPD7, EPHB6, FBXO38, IL23R, IL4R, IL7R, KLRD1, MAD2L2, PNKD, PTPN6, PTPRC, RFTN1, SUSD4, TRBC1]
GO:0002474	antigen processing and presentation of peptide antigen via MHC class I	GO_ImmuneSystemProcess-EBI-UniProt-GOA-ACAP-ARAP_02.03.2021_00h00	1	1	0.146952	1	[3]	Group16	5.76923	6	[CD36, NCF4, PNKD, PSMB2, PSMB6, PSMB9]
GO:0002478	antigen processing and presentation of exogenous peptide antigen	GO_ImmuneSystemProcess-EBI-UniProt-GOA-ACAP-ARAP_02.03.2021_00h00	0.281228	1	0.146952	1	[3]	Group16	4.30108	8	[AP1S3, CD36, NCF4, OSBPL1A, PSMB2, PSMB6, PSMB9, RACGAP1]
GO:0002521	leukocyte differentiation	GO_ImmuneSystemProcess-EBI-UniProt-GOA-ACAP-ARAP_02.03.2021_00h00	0.403186	1	0.403778	1	[4]	Group08	7.10572	41	[CCR1, CCR7, CD4, CD83, CDKN1A, DOCK10, DUSP10, ENTPD7, FASN, FOXN1, GAB2, GPC3, HDAC9, IFNE, IFNW1, IL23R, IL4R, IL7R, ITFG2, KAT2A, LRRK1, MYH9, NHEJ1, NKAP, PARP1, PLCL2, PNKD, PPARGC1B, PRKDC, PTPN6, PTPRC, RUNX2, RUNX3, SH3PXD2A, SOS1, SP3, SPINK5, TMEM131L, TSC1, TYRO3, XRCC6]
GO:0002548	monocyte chemotaxis	GO_ImmuneSystemProcess-EBI-UniProt-GOA-ACAP-ARAP_02.03.2021_00h00	0.80922	1	0.895103	1	[3]	Group10	6.75676	5	[CCR1, FOLR2, GREM1, MSMP, SERPINE1]
GO:0002573	myeloid leukocyte differentiation	GO_ImmuneSystemProcess-EBI-UniProt-GOA-ACAP-ARAP_02.03.2021_00h00	1	1	0.403778	1	[5]	Group08	6.03448	14	[CCR1, CCR7, CD4, CDKN1A, FASN, GAB2, GPC3, IL23R, LRRK1, MYH9, PARP1, PPARGC1B, SH3PXD2A, SP3]
GO:0002637	regulation of immunoglobulin production	GO_ImmuneSystemProcess-EBI-UniProt-GOA-ACAP-ARAP_02.03.2021_00h00	1	1	0.904965	1	[3, 4]	Group12	6.0241	5	[IL4R, MAD2L2, PRKDC, PTPRC, TMBIM6]
GO:0002687	positive regulation of leukocyte migration	GO_ImmuneSystemProcess-EBI-UniProt-GOA-ACAP-ARAP_02.03.2021_00h00	0.380715	1	0.895103	1	[2, 3]	Group10	4.16667	6	[CCR1, CCR7, DOCK8, ITGA2B, P2RY12, SERPINE1]
GO:0002688	regulation of leukocyte chemotaxis	GO_ImmuneSystemProcess-EBI-UniProt-GOA-ACAP-ARAP_02.03.2021_00h00	0.718923	1	0.895103	1	[3]	Group10	5.22388	7	[CCR1, CCR7, GREM1, KLRK1, MTUS1, RIN3, SERPINE1]
GO:0002695	negative regulation of leukocyte activation	GO_ImmuneSystemProcess-EBI-UniProt-GOA-ACAP-ARAP_02.03.2021_00h00	1	1	0.443723	1	[2, 3]	Group18	6.28272	12	[BANK1, CLNK, DLG5, FGL1, IL4R, LRRC32, PTPN6, PTPRC, RUNX3, TMEM131L, TYRO3, VTCN1]
GO:0002696	positive regulation of leukocyte activation	GO_ImmuneSystemProcess-EBI-UniProt-GOA-ACAP-ARAP_02.03.2021_00h00	0.677885	1	0.443723	1	[2, 3]	Group18	6.77201	30	[CCDC88B, CCR7, CD4, CD47, CD83, CDKN1A, CLEC7A, DOCK8, DUSP10, EPHB6, GAB2, GPAM, GRB2, HAVCR1, IL23R, IL4R, IL7R, KLRK1, MAD2L2, NKAP, PAK1, PRKDC, PTPN6, PTPRC, RUNX3, STXBP1, TRBC1, VTCN1, XRCC6, ZNF335]
GO:0002698	negative regulation of immune effector process	GO_ImmuneSystemProcess-EBI-UniProt-GOA-ACAP-ARAP_02.03.2021_00h00	0.00467466	0.504863	0.108396	1	[2, 3]	Group09	13.1783	17	[ANGPT1, CD47, CD59, DUSP10, GPATCH3, IL4R, IL7R, KLRD1, NLRX1, NPLOC4, PRKDC, PTPN6, PTPRC, SPINK5, SUSD4, TKFC, TMBIM6]
GO:0002699	positive regulation of immune effector process	GO_ImmuneSystemProcess-EBI-UniProt-GOA-ACAP-ARAP_02.03.2021_00h00	0.688239	1	0.904965	1	[2, 3]	Group12	5.57769	14	[CD36, CLEC7A, CLNK, FBXO38, GAB2, IL23R, IL4R, KLRD1, KLRK1, MAD2L2, MAVS, PNKD, PTPRC, STXBP1]
GO:0002700	regulation of production of molecular mediator of immune response	GO_ImmuneSystemProcess-EBI-UniProt-GOA-ACAP-ARAP_02.03.2021_00h00	1	1	0.904965	1	[2, 3]	Group12	6.07735	11	[ANGPT1, CD36, CLEC7A, CLNK, IL4R, MAD2L2, MAVS, PRKDC, PTPRC, SPINK5, TMBIM6]
GO:0002702	positive regulation of production of molecular mediator of immune response	GO_ImmuneSystemProcess-EBI-UniProt-GOA-ACAP-ARAP_02.03.2021_00h00	0.718929	1	0.904965	1	[2, 3, 4]	Group12	5.30303	7	[CD36, CLEC7A, CLNK, IL4R, MAD2L2, MAVS, PTPRC]
GO:0002703	regulation of leukocyte mediated immunity	GO_ImmuneSystemProcess-EBI-UniProt-GOA-ACAP-ARAP_02.03.2021_00h00	0.672338	1	0.904965	1	[3]	Group12	7.04846	16	[CLEC7A, CLNK, FBXO38, GAB2, IL23R, IL4R, IL7R, KLRD1, KLRK1, MAD2L2, MAVS, PNKD, PTPN6, PTPRC, STXBP1, SUSD4]
GO:0002704	negative regulation of leukocyte mediated immunity	GO_ImmuneSystemProcess-EBI-UniProt-GOA-ACAP-ARAP_02.03.2021_00h00	0.415108	1	0.279733	1	[3, 4]	Group11	8.62069	5	[IL7R, KLRD1, PTPN6, PTPRC, SUSD4]
GO:0002705	positive regulation of leukocyte mediated immunity	GO_ImmuneSystemProcess-EBI-UniProt-GOA-ACAP-ARAP_02.03.2021_00h00	0.72222	1	0.904965	1	[3, 4]	Group12	7.14286	10	[CLEC7A, CLNK, FBXO38, IL23R, KLRD1, KLRK1, MAD2L2, MAVS, PNKD, PTPRC]
GO:0002706	regulation of lymphocyte mediated immunity	GO_ImmuneSystemProcess-EBI-UniProt-GOA-ACAP-ARAP_02.03.2021_00h00	0.870712	1	0.39469	1	[4]	Group17	6.58683	11	[CLNK, FBXO38, IL23R, IL7R, KLRD1, KLRK1, MAD2L2, PNKD, PTPN6, PTPRC, SUSD4]
GO:0002707	negative regulation of lymphocyte mediated immunity	GO_ImmuneSystemProcess-EBI-UniProt-GOA-ACAP-ARAP_02.03.2021_00h00	0.237236	1	0.279733	1	[4, 5]	Group11	10.2041	5	[IL7R, KLRD1, PTPN6, PTPRC, SUSD4]
GO:0002708	positive regulation of lymphocyte mediated immunity	GO_ImmuneSystemProcess-EBI-UniProt-GOA-ACAP-ARAP_02.03.2021_00h00	0.696955	1	0.39469	1	[4, 5]	Group17	7.01754	8	[CLNK, FBXO38, IL23R, KLRD1, KLRK1, MAD2L2, PNKD, PTPRC]
GO:0002709	regulation of T cell mediated immunity	GO_ImmuneSystemProcess-EBI-UniProt-GOA-ACAP-ARAP_02.03.2021_00h00	0.821249	1	0.39469	1	[5]	Group17	6.97674	6	[FBXO38, IL23R, IL7R, KLRD1, PNKD, PTPRC]
GO:0002718	regulation of cytokine production involved in immune response	GO_ImmuneSystemProcess-EBI-UniProt-GOA-ACAP-ARAP_02.03.2021_00h00	0.683435	1	0.904965	1	[3, 4]	Group12	4.7619	5	[ANGPT1, CD36, CLEC7A, CLNK, MAVS]
GO:0002757	immune response-activating signal transduction	GO_ImmuneSystemProcess-EBI-UniProt-GOA-ACAP-ARAP_02.03.2021_00h00	0.120723	1	0.146952	1	[2, 4, 5]	Group16	4.77099	25	[ACTG1, BTRC, CCR7, CD4, CD47, DOCK1, ELMO2, GRB2, KLRD1, KRAS, NCOR2, PAK1, PDE4B, PLCL2, PLPP4, PRKCE, PSMB2, PSMB6, PSMB9, PTPN6, PTPRC, RFTN1, TRBC1, VTCN1, WASL]
GO:0002758	innate immune response-activating signal transduction	GO_ImmuneSystemProcess-EBI-UniProt-GOA-ACAP-ARAP_02.03.2021_00h00	0.85317	1	0.146952	1	[3, 5, 6]	Group16	5.55556	7	[BTRC, KLRD1, KRAS, PAK1, PSMB2, PSMB6, PSMB9]
GO:0002764	immune response-regulating signaling pathway	GO_ImmuneSystemProcess-EBI-UniProt-GOA-ACAP-ARAP_02.03.2021_00h00	0.257348	1	0.146952	1	[3]	Group16	5.17857	29	[ACTG1, BTRC, CCR7, CD4, CD47, DOCK1, ELMO2, GAB2, GRB2, KLRD1, KRAS, MAP2K4, NCOR2, PAK1, PDE4B, PLCL2, PLPP4, PPP3CA, PRKCE, PSMB2, PSMB6, PSMB9, PTPN6, PTPRC, RFTN1, SOS1, TRBC1, VTCN1, WASL]
GO:0002768	immune response-regulating cell surface receptor signaling pathway	GO_ImmuneSystemProcess-EBI-UniProt-GOA-ACAP-ARAP_02.03.2021_00h00	0.25683	1	0.146952	1	[4]	Group16	5.20646	29	[ACTG1, BTRC, CCR7, CD4, CD47, DOCK1, ELMO2, GAB2, GRB2, KLRD1, KRAS, MAP2K4, NCOR2, PAK1, PDE4B, PLCL2, PLPP4, PPP3CA, PRKCE, PSMB2, PSMB6, PSMB9, PTPN6, PTPRC, RFTN1, SOS1, TRBC1, VTCN1, WASL]
GO:0002819	regulation of adaptive immune response	GO_ImmuneSystemProcess-EBI-UniProt-GOA-ACAP-ARAP_02.03.2021_00h00	0.875336	1	0.279733	1	[3]	Group11	6.62983	12	[CD4, DUSP10, FBXO38, IL23R, IL4R, IL7R, KLRD1, MAD2L2, PNKD, PTPN6, PTPRC, SUSD4]
GO:0002820	negative regulation of adaptive immune response	GO_ImmuneSystemProcess-EBI-UniProt-GOA-ACAP-ARAP_02.03.2021_00h00	0.159962	1	0.279733	1	[3, 4]	Group11	10.9091	6	[IL4R, IL7R, KLRD1, PTPN6, PTPRC, SUSD4]
GO:0002821	positive regulation of adaptive immune response	GO_ImmuneSystemProcess-EBI-UniProt-GOA-ACAP-ARAP_02.03.2021_00h00	0.843608	1	0.39469	1	[3, 4]	Group17	5.45455	6	[CD4, FBXO38, IL23R, MAD2L2, PNKD, PTPRC]
GO:0002822	regulation of adaptive immune response based on somatic recombination of immune receptors built from immunoglobulin superfamily domains	GO_ImmuneSystemProcess-EBI-UniProt-GOA-ACAP-ARAP_02.03.2021_00h00	0.870179	1	0.39469	1	[4]	Group17	6.62651	11	[CD4, FBXO38, IL23R, IL4R, IL7R, KLRD1, MAD2L2, PNKD, PTPN6, PTPRC, SUSD4]
GO:0002823	negative regulation of adaptive immune response based on somatic recombination of immune receptors built from immunoglobulin superfamily domains	GO_ImmuneSystemProcess-EBI-UniProt-GOA-ACAP-ARAP_02.03.2021_00h00	0.131349	1	0.279733	1	[4, 5]	Group11	12	6	[IL4R, IL7R, KLRD1, PTPN6, PTPRC, SUSD4]
GO:0002824	positive regulation of adaptive immune response based on somatic recombination of immune receptors built from immunoglobulin superfamily domains	GO_ImmuneSystemProcess-EBI-UniProt-GOA-ACAP-ARAP_02.03.2021_00h00	1	1	0.39469	1	[4, 5]	Group17	5.71429	6	[CD4, FBXO38, IL23R, MAD2L2, PNKD, PTPRC]
GO:0002861	regulation of inflammatory response to antigenic stimulus	GO_ImmuneSystemProcess-EBI-UniProt-GOA-ACAP-ARAP_02.03.2021_00h00	0.414289	1	0.108396	1	[3]	Group09	4.95868	12	[ADCY2, ADCY8, ADCYAP1R1, AVP, CCR7, DHX15, GLP2R, GPR83, HTR4, MYH9, RXFP1, VIPR2]
GO:0002862	negative regulation of inflammatory response to antigenic stimulus	GO_ImmuneSystemProcess-EBI-UniProt-GOA-ACAP-ARAP_02.03.2021_00h00	0.399606	1	0.108396	1	[3, 4]	Group09	4.86726	11	[ADCY2, ADCY8, ADCYAP1R1, AVP, DHX15, GLP2R, GPR83, HTR4, MYH9, RXFP1, VIPR2]
GO:0002920	regulation of humoral immune response	GO_ImmuneSystemProcess-EBI-UniProt-GOA-ACAP-ARAP_02.03.2021_00h00	0.733882	1	0.39469	1	[3]	Group17	5.22876	8	[CCR7, CD59, CFP, PROS1, PTPN6, PTPRC, SPINK5, SUSD4]
GO:0030097	hemopoiesis	GO_ImmuneSystemProcess-EBI-UniProt-GOA-ACAP-ARAP_02.03.2021_00h00	0.142736	1	0.142736	1	[3]	Group14	7.35751	71	[ADD1, ANGPT1, CCR1, CCR7, CD4, CD83, CDKN1A, COMMD3-BMI1, DOCK1, DOCK10, DUSP10, EML1, ENTPD7, EPAS1, ESCO2, ETV6, FASN, FGFR2, FOXN1, GAB2, GFI1B, GPC3, HDAC9, IFNE, IFNW1, IL23R, IL4R, IL7R, ITFG2, ITGA2B, KAT2A, KMT2C, LDB2, LRRK1, LYAR, MEIS1, MYH9, MYSM1, NHEJ1, NKAP, PARP1, PGM3, PLCL2, PNKD, PPARGC1B, PRKDC, PSMB2, PSMB6, PSMB9, PTPN6, PTPRC, PURB, RBFOX2, RUNX2, RUNX3, SCIN, SH2B3, SH3PX…
GO:0030098	lymphocyte differentiation	GO_ImmuneSystemProcess-EBI-UniProt-GOA-ACAP-ARAP_02.03.2021_00h00	0.186205	1	0.384009	1	[3, 6]	Group15	7.94872	31	[CCR7, CD4, CD83, DOCK10, DUSP10, ENTPD7, FOXN1, HDAC9, IFNE, IFNW1, IL23R, IL4R, IL7R, ITFG2, KAT2A, NHEJ1, NKAP, PLCL2, PNKD, PRKDC, PTPN6, PTPRC, RUNX2, RUNX3, SOS1, SP3, SPINK5, TMEM131L, TSC1, TYRO3, XRCC6]
GO:0030099	myeloid cell differentiation	GO_ImmuneSystemProcess-EBI-UniProt-GOA-ACAP-ARAP_02.03.2021_00h00	0.91778	1	0.403778	1	[4]	Group08	6.44444	29	[ADD1, CCR1, CCR7, CD4, CDKN1A, EPAS1, FASN, GAB2, GPC3, IL23R, ITGA2B, KMT2C, LDB2, LRRK1, LYAR, MEIS1, MYH9, PARP1, PPARGC1B, PRKDC, PTPN6, PURB, RBFOX2, SCIN, SH2B3, SH3PXD2A, SP3, TNRC6B, TNRC6C]
GO:0030101	natural killer cell activation	GO_ImmuneSystemProcess-EBI-UniProt-GOA-ACAP-ARAP_02.03.2021_00h00	0.177686	1	0.39469	1	[3]	Group17	10.2273	9	[CLNK, IFNE, IFNW1, IL23R, KLRK1, PTPRC, SNX27, SP3, TYRO3]
GO:0030183	B cell differentiation	GO_ImmuneSystemProcess-EBI-UniProt-GOA-ACAP-ARAP_02.03.2021_00h00	0.605038	1	0.384009	1	[4, 7]	Group15	7.38255	11	[DOCK10, HDAC9, IFNE, IFNW1, ITFG2, NHEJ1, PLCL2, PRKDC, PTPN6, PTPRC, SP3]
GO:0030217	T cell differentiation	GO_ImmuneSystemProcess-EBI-UniProt-GOA-ACAP-ARAP_02.03.2021_00h00	0.24127	1	0.443723	1	[4, 7]	Group18	8.14815	22	[CCR7, CD4, CD83, DUSP10, ENTPD7, FOXN1, IL23R, IL4R, IL7R, KAT2A, NHEJ1, NKAP, PNKD, PRKDC, PTPRC, RUNX2, RUNX3, SOS1, SP3, SPINK5, TMEM131L, TSC1]
GO:0030218	erythrocyte differentiation	GO_ImmuneSystemProcess-EBI-UniProt-GOA-ACAP-ARAP_02.03.2021_00h00	1	1	1	1	[3, 5]	Group00	6.29921	8	[ADD1, EPAS1, LDB2, LYAR, PRKDC, RBFOX2, SH2B3, SP3]
GO:0030219	megakaryocyte differentiation	GO_ImmuneSystemProcess-EBI-UniProt-GOA-ACAP-ARAP_02.03.2021_00h00	0.293276	1	0.142736	1	[5]	Group14	9	9	[ITGA2B, KMT2C, MEIS1, PTPN6, SCIN, SH2B3, SP3, TNRC6B, TNRC6C]
GO:0030316	osteoclast differentiation	GO_ImmuneSystemProcess-EBI-UniProt-GOA-ACAP-ARAP_02.03.2021_00h00	0.834744	1	0.74036	1	[6]	Group07	6.93069	7	[CCR1, GAB2, GPC3, IL23R, LRRK1, PPARGC1B, SH3PXD2A]
GO:0031294	lymphocyte costimulation	GO_ImmuneSystemProcess-EBI-UniProt-GOA-ACAP-ARAP_02.03.2021_00h00	0.297298	1	0.443723	1	[1, 4, 5]	Group18	9.375	6	[CCR7, EPHB6, GRB2, KLRK1, PAK1, PTPN6]
GO:0031295	T cell costimulation	GO_ImmuneSystemProcess-EBI-UniProt-GOA-ACAP-ARAP_02.03.2021_00h00	0.285676	1	0.443723	1	[2, 5, 6]	Group18	9.67742	6	[CCR7, EPHB6, GRB2, KLRK1, PAK1, PTPN6]
GO:0033077	T cell differentiation in thymus	GO_ImmuneSystemProcess-EBI-UniProt-GOA-ACAP-ARAP_02.03.2021_00h00	0.165498	1	0.39469	1	[5, 8]	Group17	10	8	[CCR7, FOXN1, IL7R, PNKD, PRKDC, PTPRC, SOS1, TMEM131L]
GO:0034341	response to interferon-gamma	GO_ImmuneSystemProcess-EBI-UniProt-GOA-ACAP-ARAP_02.03.2021_00h00	0.770974	1	0.770974	1	[3]	Group06	6.69856	14	[ADAMTS13, CALCOCO2, CAMK2A, CAMK2G, CD47, IL23R, NUB1, OTOP1, STX8, STXBP1, TRIM25, TRIM62, ZYX]
GO:0035710	CD4-positive, alpha-beta T cell activation	GO_ImmuneSystemProcess-EBI-UniProt-GOA-ACAP-ARAP_02.03.2021_00h00	0.683435	1	0.443723	1	[5]	Group18	4.7619	5	[CD83, ENTPD7, IL23R, IL4R, RUNX3]
GO:0036230	granulocyte activation	GO_ImmuneSystemProcess-EBI-UniProt-GOA-ACAP-ARAP_02.03.2021_00h00	0.450487	1	0.683788	1	[3]	Group13	5.53571	31	[AGL, ARSB, ATP11A, CCT2, CCT8, CD36, CD47, CD59, CFP, CLEC5A, CPPED1, DDX3X, DEGS1, DLC1, FUCA2, GYG1, HVCN1, IST1, KCMF1, LAMP2, MMP12, NDUFC2, PTPN6, PTPRB, PTPRC, RAB37, RCAN1, ROCK1, SCAMP1, TADA2A, XRCC6]
GO:0038093	Fc receptor signaling pathway	GO_ImmuneSystemProcess-EBI-UniProt-GOA-ACAP-ARAP_02.03.2021_00h00	0.693335	1	0.146952	1	[5]	Group16	6.87023	18	[ACTG1, BTRC, CD47, DOCK1, ELMO2, GAB2, GRB2, MAP2K4, PAK1, PLPP4, PPP3CA, PRKCE, PSMB2, PSMB6, PSMB9, PTPRC, SOS1, WASL]
GO:0038094	Fc-gamma receptor signaling pathway	GO_ImmuneSystemProcess-EBI-UniProt-GOA-ACAP-ARAP_02.03.2021_00h00	0.867236	1	0.146952	1	[6]	Group16	6.45161	10	[ACTG1, CD47, DOCK1, ELMO2, GRB2, PAK1, PLPP4, PRKCE, PTPRC, WASL]
GO:0038095	Fc-epsilon receptor signaling pathway	GO_ImmuneSystemProcess-EBI-UniProt-GOA-ACAP-ARAP_02.03.2021_00h00	0.756173	1	0.146952	1	[6]	Group16	5.40541	10	[BTRC, GAB2, GRB2, MAP2K4, PAK1, PPP3CA, PSMB2, PSMB6, PSMB9, SOS1]
GO:0038096	Fc-gamma receptor signaling pathway involved in phagocytosis	GO_ImmuneSystemProcess-EBI-UniProt-GOA-ACAP-ARAP_02.03.2021_00h00	0.865658	1	0.146952	1	[3, 5, 6, 7, 8]	Group16	6.53595	10	[ACTG1, CD47, DOCK1, ELMO2, GRB2, PAK1, PLPP4, PRKCE, PTPRC, WASL]
GO:0039528	cytoplasmic pattern recognition receptor signaling pathway in response to virus	GO_ImmuneSystemProcess-EBI-UniProt-GOA-ACAP-ARAP_02.03.2021_00h00	0.0611615	1	0.0810933	1	[3]	Group05	14.7059	5	[GPATCH3, NLRX1, NPLOC4, TKFC, TRIM25]
GO:0042098	T cell proliferation	GO_ImmuneSystemProcess-EBI-UniProt-GOA-ACAP-ARAP_02.03.2021_00h00	0.663305	1	0.443723	1	[4]	Group18	7.04225	15	[CCDC88B, CCND3, CD4, CTPS1, DLG5, DOCK8, EPHB6, GPAM, IL23R, LRRC32, PTPN6, PTPRC, SOS1, TMEM131L, VTCN1]
GO:0042100	B cell proliferation	GO_ImmuneSystemProcess-EBI-UniProt-GOA-ACAP-ARAP_02.03.2021_00h00	0.834744	1	0.384009	1	[4]	Group15	6.93069	7	[CDKN1A, CTPS1, IFNE, IFNW1, IL7R, PLCL2, PTPRC]
GO:0042102	positive regulation of T cell proliferation	GO_ImmuneSystemProcess-EBI-UniProt-GOA-ACAP-ARAP_02.03.2021_00h00	1	1	0.39469	1	[5, 6]	Group17	5.66038	6	[CCDC88B, CD4, GPAM, IL23R, PTPRC, VTCN1]
GO:0042110	T cell activation	GO_ImmuneSystemProcess-EBI-UniProt-GOA-ACAP-ARAP_02.03.2021_00h00	0.0507347	1	0.443723	1	[3]	Group18	8.34951	43	[CCDC88B, CCND3, CCR7, CD4, CD47, CD83, CLEC7A, CTPS1, CXADR, DLG5, DOCK8, DUSP10, ENTPD7, EPHB6, FGL1, FOXN1, GPAM, GRB2, IFNE, IFNW1, IL23R, IL4R, IL7R, KAT2A, KLRK1, LRRC32, MYH9, NHEJ1, NKAP, PAK1, PNKD, PPP3CA, PRKDC, PTPN6, PTPRC, RUNX2, RUNX3, SOS1, SP3, SPINK5, TMEM131L, TSC1, VTCN1]
GO:0042113	B cell activation	GO_ImmuneSystemProcess-EBI-UniProt-GOA-ACAP-ARAP_02.03.2021_00h00	0.17514	1	0.384009	1	[3]	Group15	4.65753	17	[BANK1, CDKN1A, CTPS1, DOCK10, HDAC9, IFNE, IFNW1, IL7R, ITFG2, MAD2L2, NHEJ1, PLCL2, PRKDC, PTPN6, PTPRC, SP3, TRBC1]
GO:0042116	macrophage activation	GO_ImmuneSystemProcess-EBI-UniProt-GOA-ACAP-ARAP_02.03.2021_00h00	0.685226	1	0.685226	1	[3]	Group01	4.6729	5	[DYSF, IL4R, PRKCE, PTPRC, SUCNR1]
GO:0042119	neutrophil activation	GO_ImmuneSystemProcess-EBI-UniProt-GOA-ACAP-ARAP_02.03.2021_00h00	0.450362	1	0.683788	1	[4]	Group13	5.58559	31	[AGL, ARSB, ATP11A, CCT2, CCT8, CD36, CD47, CD59, CFP, CLEC5A, CPPED1, DDX3X, DEGS1, DLC1, FUCA2, GYG1, HVCN1, IST1, KCMF1, LAMP2, MMP12, NDUFC2, PTPN6, PTPRB, PTPRC, RAB37, RCAN1, ROCK1, SCAMP1, TADA2A, XRCC6]
GO:0042129	regulation of T cell proliferation	GO_ImmuneSystemProcess-EBI-UniProt-GOA-ACAP-ARAP_02.03.2021_00h00	1	1	0.443723	1	[5]	Group18	6.01093	11	[CCDC88B, CD4, DLG5, GPAM, IL23R, LRRC32, PTPN6, PTPRC, SOS1, TMEM131L, VTCN1]
GO:0042130	negative regulation of T cell proliferation	GO_ImmuneSystemProcess-EBI-UniProt-GOA-ACAP-ARAP_02.03.2021_00h00	0.805399	1	0.443723	1	[5, 6]	Group18	6.94444	5	[DLG5, LRRC32, PTPN6, TMEM131L, VTCN1]
GO:0042267	natural killer cell mediated cytotoxicity	GO_ImmuneSystemProcess-EBI-UniProt-GOA-ACAP-ARAP_02.03.2021_00h00	0.802155	1	0.39469	1	[4, 5]	Group17	7.14286	5	[KLRD1, KLRK1, PLEKHM2, PTPN6, RNF19B]
GO:0042590	antigen processing and presentation of exogenous peptide antigen via MHC class I	GO_ImmuneSystemProcess-EBI-UniProt-GOA-ACAP-ARAP_02.03.2021_00h00	1	1	0.146952	1	[4]	Group16	5.88235	5	[CD36, NCF4, PSMB2, PSMB6, PSMB9]
GO:0043312	neutrophil degranulation	GO_ImmuneSystemProcess-EBI-UniProt-GOA-ACAP-ARAP_02.03.2021_00h00	0.631818	1	0.683788	1	[3, 5, 6]	Group13	5.75139	31	[AGL, ARSB, ATP11A, CCT2, CCT8, CD36, CD47, CD59, CFP, CLEC5A, CPPED1, DDX3X, DEGS1, DLC1, FUCA2, GYG1, HVCN1, IST1, KCMF1, LAMP2, MMP12, NDUFC2, PTPN6, PTPRB, PTPRC, RAB37, RCAN1, ROCK1, SCAMP1, TADA2A, XRCC6]
GO:0045058	T cell selection	GO_ImmuneSystemProcess-EBI-UniProt-GOA-ACAP-ARAP_02.03.2021_00h00	0.380024	1	0.39469	1	[1, 5, 8]	Group17	9.61539	5	[CCR7, CD4, FOXN1, IL23R, PTPRC]
GO:0045088	regulation of innate immune response	GO_ImmuneSystemProcess-EBI-UniProt-GOA-ACAP-ARAP_02.03.2021_00h00	0.639483	1	1	1	[3]	Group04	6.86567	23	[BTRC, CLNK, CNOT7, DUSP10, KLRD1, KLRK1, KRAS, LYAR, MAVS, MMP12, N4BP1, NLRX1, OTOP1, PAK1, PRKDC, PSMB2, PSMB6, PSMB9, PTPN6, SUSD4, TKFC, TYRO3, XRCC6]
GO:0045089	positive regulation of innate immune response	GO_ImmuneSystemProcess-EBI-UniProt-GOA-ACAP-ARAP_02.03.2021_00h00	0.679342	1	0.146952	1	[3, 4]	Group16	5.50847	13	[BTRC, CLNK, KLRD1, KLRK1, KRAS, MAVS, MMP12, PAK1, PRKDC, PSMB2, PSMB6, PSMB9, XRCC6]
GO:0045576	mast cell activation	GO_ImmuneSystemProcess-EBI-UniProt-GOA-ACAP-ARAP_02.03.2021_00h00	0.80922	1	0.80922	1	[3]	Group02	6.75676	5	[CLNK, GAB2, HAVCR1, IL4R, STXBP1]
GO:0045580	regulation of T cell differentiation	GO_ImmuneSystemProcess-EBI-UniProt-GOA-ACAP-ARAP_02.03.2021_00h00	0.306206	1	0.443723	1	[5, 7, 8]	Group18	8.49673	13	[CD83, DUSP10, FOXN1, IL23R, IL4R, IL7R, KAT2A, NKAP, PTPRC, RUNX3, SOS1, SPINK5, TMEM131L]
GO:0045582	positive regulation of T cell differentiation	GO_ImmuneSystemProcess-EBI-UniProt-GOA-ACAP-ARAP_02.03.2021_00h00	0.383909	1	0.39469	1	[5, 6, 7, 8, 9]	Group17	8.60215	8	[CD83, DUSP10, IL23R, IL4R, IL7R, NKAP, PTPRC, RUNX3]
GO:0045619	regulation of lymphocyte differentiation	GO_ImmuneSystemProcess-EBI-UniProt-GOA-ACAP-ARAP_02.03.2021_00h00	0.161372	1	0.443723	1	[4, 6, 7]	Group18	8.79121	16	[CD83, DUSP10, FOXN1, IL23R, IL4R, IL7R, KAT2A, NKAP, PRKDC, PTPN6, PTPRC, RUNX3, SOS1, SPINK5, TMEM131L, XRCC6]
GO:0045621	positive regulation of lymphocyte differentiation	GO_ImmuneSystemProcess-EBI-UniProt-GOA-ACAP-ARAP_02.03.2021_00h00	0.219726	1	0.39469	1	[4, 5, 6, 7, 8]	Group17	9.43396	10	[CD83, DUSP10, IL23R, IL4R, IL7R, NKAP, PRKDC, PTPRC, RUNX3, XRCC6]
GO:0045637	regulation of myeloid cell differentiation	GO_ImmuneSystemProcess-EBI-UniProt-GOA-ACAP-ARAP_02.03.2021_00h00	0.515155	1	0.74036	1	[3, 5]	Group07	5.22388	14	[CCR1, CD4, IL23R, ITGA2B, KMT2C, LDB2, MEIS1, PPARGC1B, PRKDC, PURB, RBFOX2, SCIN, TNRC6B, TNRC6C]
GO:0045639	positive regulation of myeloid cell differentiation	GO_ImmuneSystemProcess-EBI-UniProt-GOA-ACAP-ARAP_02.03.2021_00h00	1	1	0.74036	1	[4, 5, 6]	Group07	5.55556	6	[CCR1, CD4, IL23R, PPARGC1B, PRKDC, SCIN]
GO:0045652	regulation of megakaryocyte differentiation	GO_ImmuneSystemProcess-EBI-UniProt-GOA-ACAP-ARAP_02.03.2021_00h00	1	1	0.142736	1	[4, 6]	Group14	6.17284	5	[ITGA2B, KMT2C, SCIN, TNRC6B, TNRC6C]
GO:0045824	negative regulation of innate immune response	GO_ImmuneSystemProcess-EBI-UniProt-GOA-ACAP-ARAP_02.03.2021_00h00	0.0431357	1	1	1	[3, 4]	Group04	12.6761	9	[CNOT7, DUSP10, KLRD1, LYAR, MMP12, NLRX1, OTOP1, SUSD4, TYRO3]
GO:0046631	alpha-beta T cell activation	GO_ImmuneSystemProcess-EBI-UniProt-GOA-ACAP-ARAP_02.03.2021_00h00	0.402892	1	0.384009	1	[4]	Group15	4.4586	7	[CD83, ENTPD7, IL23R, IL4R, NKAP, PTPRC, RUNX3]
GO:0046632	alpha-beta T cell differentiation	GO_ImmuneSystemProcess-EBI-UniProt-GOA-ACAP-ARAP_02.03.2021_00h00	0.844155	1	0.443723	1	[5, 8]	Group18	5.30973	6	[CD83, ENTPD7, IL23R, IL4R, NKAP, RUNX3]
GO:0046634	regulation of alpha-beta T cell activation	GO_ImmuneSystemProcess-EBI-UniProt-GOA-ACAP-ARAP_02.03.2021_00h00	1	1	0.443723	1	[5]	Group18	5.76923	6	[CD83, IL23R, IL4R, NKAP, PTPRC, RUNX3]
GO:0046635	positive regulation of alpha-beta T cell activation	GO_ImmuneSystemProcess-EBI-UniProt-GOA-ACAP-ARAP_02.03.2021_00h00	0.317542	1	0.443723	1	[5, 6]	Group18	8.95522	6	[CD83, IL23R, IL4R, NKAP, PTPRC, RUNX3]
GO:0046637	regulation of alpha-beta T cell differentiation	GO_ImmuneSystemProcess-EBI-UniProt-GOA-ACAP-ARAP_02.03.2021_00h00	0.618976	1	0.443723	1	[6, 8, 9]	Group18	7.35294	5	[CD83, IL23R, IL4R, NKAP, RUNX3]
GO:0046638	positive regulation of alpha-beta T cell differentiation	GO_ImmuneSystemProcess-EBI-UniProt-GOA-ACAP-ARAP_02.03.2021_00h00	0.237236	1	0.443723	1	[6, 7, 8, 9, 10]	Group18	10.2041	5	[CD83, IL23R, IL4R, NKAP, RUNX3]
GO:0046651	lymphocyte proliferation	GO_ImmuneSystemProcess-EBI-UniProt-GOA-ACAP-ARAP_02.03.2021_00h00	0.712769	1	0.443723	1	[3]	Group18	6.86275	21	[CCDC88B, CCND3, CD4, CDKN1A, CTPS1, DLG5, DOCK8, EPHB6, GPAM, IFNE, IFNW1, IL23R, IL7R, LRRC32, PLCL2, PTPN6, PTPRC, SOS1, TMEM131L, VTCN1, ZNF335]
GO:0048538	thymus development	GO_ImmuneSystemProcess-EBI-UniProt-GOA-ACAP-ARAP_02.03.2021_00h00	0.255538	1	0.255538	1	[3]	Group03	9.80392	5	[CSRP3, FOXN1, JARID2, PRKDC, TYR]
GO:0050670	regulation of lymphocyte proliferation	GO_ImmuneSystemProcess-EBI-UniProt-GOA-ACAP-ARAP_02.03.2021_00h00	0.680384	1	0.443723	1	[4]	Group18	5.41667	13	[CCDC88B, CD4, CDKN1A, DLG5, GPAM, IL23R, LRRC32, PTPN6, PTPRC, SOS1, TMEM131L, VTCN1, ZNF335]
GO:0050671	positive regulation of lymphocyte proliferation	GO_ImmuneSystemProcess-EBI-UniProt-GOA-ACAP-ARAP_02.03.2021_00h00	0.86189	1	0.39469	1	[4, 5]	Group17	5.47945	8	[CCDC88B, CD4, CDKN1A, GPAM, IL23R, PTPRC, VTCN1, ZNF335]
GO:0050672	negative regulation of lymphocyte proliferation	GO_ImmuneSystemProcess-EBI-UniProt-GOA-ACAP-ARAP_02.03.2021_00h00	1	1	0.443723	1	[4, 5]	Group18	5.68182	5	[DLG5, LRRC32, PTPN6, TMEM131L, VTCN1]
GO:0050688	regulation of defense response to virus	GO_ImmuneSystemProcess-EBI-UniProt-GOA-ACAP-ARAP_02.03.2021_00h00	0.0431357	1	0.0810933	1	[3]	Group05	12.6761	9	[GPATCH3, IL23R, MAVS, MMP12, NLRX1, NPLOC4, RNF216, TKFC, TRIM44]
GO:0050691	regulation of defense response to virus by host	GO_ImmuneSystemProcess-EBI-UniProt-GOA-ACAP-ARAP_02.03.2021_00h00	0.198992	1	0.0810933	1	[4]	Group05	11.3636	5	[IL23R, MAVS, MMP12, RNF216, TRIM44]
GO:0050777	negative regulation of immune response	GO_ImmuneSystemProcess-EBI-UniProt-GOA-ACAP-ARAP_02.03.2021_00h00	0.571727	1	1	1	[2, 3]	Group04	7.08447	26	[ADCY2, ADCY8, ADCYAP1R1, AVP, CD59, CNOT7, DHX15, DUSP10, GLP2R, GPR83, HTR4, IL4R, IL7R, KLRD1, LYAR, MMP12, MYH9, NLRX1, OTOP1, PTPN6, PTPRC, RXFP1, SPINK5, SUSD4, TYRO3, VIPR2]
GO:0050778	positive regulation of immune response	GO_ImmuneSystemProcess-EBI-UniProt-GOA-ACAP-ARAP_02.03.2021_00h00	0.123133	1	0.146952	1	[2, 3]	Group16	5.17449	43	[ACTG1, BTRC, C1RL, CCR7, CD4, CD47, CD59, CFP, CLNK, DOCK1, ELMO2, FBXO38, GAB2, GRB2, IL23R, IL4R, KLRD1, KLRK1, KRAS, MAD2L2, MAVS, MMP12, NCOR2, PAK1, PDE4B, PLCL2, PLPP4, PNKD, PRKCE, PRKDC, PROS1, PSMB2, PSMB6, PSMB9, PTPN6, PTPRC, RFTN1, STXBP1, SUSD4, TRBC1, VTCN1, WASL, XRCC6]
GO:0050851	antigen receptor-mediated signaling pathway	GO_ImmuneSystemProcess-EBI-UniProt-GOA-ACAP-ARAP_02.03.2021_00h00	0.0859033	1	0.146952	1	[4, 6, 7]	Group16	4.21348	15	[BTRC, CCR7, CD4, NCOR2, PAK1, PDE4B, PLCL2, PSMB2, PSMB6, PSMB9, PTPN6, PTPRC, RFTN1, TRBC1, VTCN1]
GO:0050852	T cell receptor signaling pathway	GO_ImmuneSystemProcess-EBI-UniProt-GOA-ACAP-ARAP_02.03.2021_00h00	1	1	0.146952	1	[5, 7, 8]	Group16	6.39269	14	[BTRC, CCR7, CD4, NCOR2, PAK1, PDE4B, PSMB2, PSMB6, PSMB9, PTPN6, PTPRC, RFTN1, TRBC1, VTCN1]
GO:0050863	regulation of T cell activation	GO_ImmuneSystemProcess-EBI-UniProt-GOA-ACAP-ARAP_02.03.2021_00h00	0.204998	1	0.443723	1	[4]	Group18	7.95455	28	[CCDC88B, CCR7, CD4, CD47, CD83, DLG5, DOCK8, DUSP10, EPHB6, FGL1, FOXN1, GPAM, GRB2, IL23R, IL4R, IL7R, KAT2A, KLRK1, LRRC32, NKAP, PAK1, PTPN6, PTPRC, RUNX3, SOS1, SPINK5, TMEM131L, VTCN1]
GO:0050868	negative regulation of T cell activation	GO_ImmuneSystemProcess-EBI-UniProt-GOA-ACAP-ARAP_02.03.2021_00h00	0.851623	1	0.443723	1	[4, 5]	Group18	6.50407	8	[DLG5, FGL1, IL4R, LRRC32, PTPN6, RUNX3, TMEM131L, VTCN1]
GO:0050870	positive regulation of T cell activation	GO_ImmuneSystemProcess-EBI-UniProt-GOA-ACAP-ARAP_02.03.2021_00h00	0.123159	1	0.443723	1	[4, 5]	Group18	8.77193	20	[CCDC88B, CCR7, CD4, CD47, CD83, DOCK8, DUSP10, EPHB6, GPAM, GRB2, IL23R, IL4R, IL7R, KLRK1, NKAP, PAK1, PTPN6, PTPRC, RUNX3, VTCN1]
GO:0051249	regulation of lymphocyte activation	GO_ImmuneSystemProcess-EBI-UniProt-GOA-ACAP-ARAP_02.03.2021_00h00	0.636185	1	0.443723	1	[3]	Group18	6.83453	38	[BANK1, CCDC88B, CCR7, CD4, CD47, CD83, CDKN1A, CLEC7A, CLNK, DLG5, DOCK8, DUSP10, EPHB6, FGL1, FOXN1, GPAM, GRB2, IL23R, IL4R, IL7R, KAT2A, KLRK1, LRRC32, MAD2L2, NKAP, PAK1, PRKDC, PTPN6, PTPRC, RUNX3, SOS1, SPINK5, TMEM131L, TRBC1, TYRO3, VTCN1, XRCC6, ZNF335]
GO:0051250	negative regulation of lymphocyte activation	GO_ImmuneSystemProcess-EBI-UniProt-GOA-ACAP-ARAP_02.03.2021_00h00	0.738898	1	0.443723	1	[3, 4]	Group18	6.91824	11	[BANK1, CLNK, DLG5, FGL1, IL4R, LRRC32, PTPN6, RUNX3, TMEM131L, TYRO3, VTCN1]
GO:0051251	positive regulation of lymphocyte activation	GO_ImmuneSystemProcess-EBI-UniProt-GOA-ACAP-ARAP_02.03.2021_00h00	0.662807	1	0.443723	1	[3, 4]	Group18	6.81818	27	[CCDC88B, CCR7, CD4, CD47, CD83, CDKN1A, CLEC7A, DOCK8, DUSP10, EPHB6, GPAM, GRB2, IL23R, IL4R, IL7R, KLRK1, MAD2L2, NKAP, PAK1, PRKDC, PTPN6, PTPRC, RUNX3, TRBC1, VTCN1, XRCC6, ZNF335]
GO:0060218	hematopoietic stem cell differentiation	GO_ImmuneSystemProcess-EBI-UniProt-GOA-ACAP-ARAP_02.03.2021_00h00	1	1	0.146952	1	[5]	Group16	5.43478	5	[LDB2, PRKDC, PSMB2, PSMB6, PSMB9]
GO:0060333	interferon-gamma-mediated signaling pathway	GO_ImmuneSystemProcess-EBI-UniProt-GOA-ACAP-ARAP_02.03.2021_00h00	0.832369	1	0.770974	1	[5]	Group06	5.15464	5	[CAMK2A, CAMK2G, OTOP1, TRIM25, TRIM62]
GO:0061515	myeloid cell development	GO_ImmuneSystemProcess-EBI-UniProt-GOA-ACAP-ARAP_02.03.2021_00h00	0.805399	1	0.142736	1	[5]	Group14	6.94444	5	[LRRK1, LYAR, MEIS1, PTPN6, SH2B3]
GO:0071346	cellular response to interferon-gamma	GO_ImmuneSystemProcess-EBI-UniProt-GOA-ACAP-ARAP_02.03.2021_00h00	0.878578	1	0.770974	1	[4]	Group06	5.85106	11	[ADAMTS13, CAMK2A, CAMK2G, CD47, OTOP1, STX8, STXBP1, TRIM25, TRIM62, ZYX]
GO:0071675	regulation of mononuclear cell migration	GO_ImmuneSystemProcess-EBI-UniProt-GOA-ACAP-ARAP_02.03.2021_00h00	1	1	0.895103	1	[3]	Group10	5.9322	7	[CCR1, CCR7, DOCK8, GREM1, KLRK1, SERPINE1, WASL]
GO:0072676	lymphocyte migration	GO_ImmuneSystemProcess-EBI-UniProt-GOA-ACAP-ARAP_02.03.2021_00h00	0.575366	1	0.895103	1	[3]	Group10	7.31707	9	[CCR7, CYP7B1, DOCK8, F11R, KLRK1, MSMP, RET, SLC12A2, WASL]
GO:1901532	regulation of hematopoietic progenitor cell differentiation	GO_ImmuneSystemProcess-EBI-UniProt-GOA-ACAP-ARAP_02.03.2021_00h00	1	1	0.146952	1	[5]	Group16	6.31579	6	[LDB2, PRKDC, PSMB2, PSMB6, PSMB9, SOS1]
GO:1902036	regulation of hematopoietic stem cell differentiation	GO_ImmuneSystemProcess-EBI-UniProt-GOA-ACAP-ARAP_02.03.2021_00h00	1	1	0.146952	1	[6]	Group16	6.41026	5	[LDB2, PRKDC, PSMB2, PSMB6, PSMB9]
GO:1902105	regulation of leukocyte differentiation	GO_ImmuneSystemProcess-EBI-UniProt-GOA-ACAP-ARAP_02.03.2021_00h00	0.901138	1	0.39469	1	[3, 5]	Group17	6.44068	19	[CCR1, CD4, CD83, DUSP10, FOXN1, IL23R, IL4R, IL7R, KAT2A, NKAP, PPARGC1B, PRKDC, PTPN6, PTPRC, RUNX3, SOS1, SPINK5, TMEM131L, XRCC6]
GO:1902107	positive regulation of leukocyte differentiation	GO_ImmuneSystemProcess-EBI-UniProt-GOA-ACAP-ARAP_02.03.2021_00h00	0.410285	1	0.74036	1	[3, 4, 5, 6]	Group07	7.92683	13	[CCR1, CD4, CD83, DUSP10, IL23R, IL4R, IL7R, NKAP, PPARGC1B, PRKDC, PTPRC, RUNX3, XRCC6]
GO:1903131	mononuclear cell differentiation	GO_ImmuneSystemProcess-EBI-UniProt-GOA-ACAP-ARAP_02.03.2021_00h00	0.349447	1	0.384009	1	[5]	Group15	7.41573	33	[CCR7, CD4, CD83, DOCK10, DUSP10, ENTPD7, FASN, FOXN1, HDAC9, IFNE, IFNW1, IL23R, IL4R, IL7R, ITFG2, KAT2A, MYH9, NHEJ1, NKAP, PLCL2, PNKD, PRKDC, PTPN6, PTPRC, RUNX2, RUNX3, SOS1, SP3, SPINK5, TMEM131L, TSC1, TYRO3, XRCC6]
GO:1903706	regulation of hemopoiesis	GO_ImmuneSystemProcess-EBI-UniProt-GOA-ACAP-ARAP_02.03.2021_00h00	0.598366	1	0.142736	1	[2, 4]	Group14	6.96056	30	[CCR1, CD4, CD83, DUSP10, FOXN1, GFI1B, IL23R, IL4R, IL7R, ITGA2B, KAT2A, KMT2C, LDB2, MEIS1, MYSM1, NKAP, PPARGC1B, PRKDC, PTPN6, PTPRC, PURB, RBFOX2, RUNX3, SCIN, SOS1, SPINK5, TMEM131L, TNRC6B, TNRC6C, XRCC6]
GO:1903708	positive regulation of hemopoiesis	GO_ImmuneSystemProcess-EBI-UniProt-GOA-ACAP-ARAP_02.03.2021_00h00	0.410285	1	0.74036	1	[2, 3, 4, 5]	Group07	7.92683	13	[CCR1, CD4, CD83, DUSP10, IL23R, IL4R, IL7R, NKAP, PPARGC1B, PRKDC, PTPRC, RUNX3, XRCC6]

## Sheet: KEGG
GOID	GOTerm	Ontology Source	Term PValue	Term PValue Corrected with Bonferroni step down	Group PValue	Group PValue Corrected with Bonferroni step down	GOLevels	GOGroups	% Associated Genes	Nr. Genes	Associated Genes Found
KEGG:00020	Citrate cycle (TCA cycle)	KEGG_03.03.2021	0.0165302	1	0.0531086	1	[-1]	Group39	20	6	[ACO1, ACO2, IDH3G, MDH1, PC, SUCLA2]
KEGG:00190	Oxidative phosphorylation	KEGG_03.03.2021	0.86	1	0.66	1	[-1]	Group68	6.02	8	[ATP5MC3, ATP6V0A4, ATP6V1A, COX7B, NDUFA1, NDUFC2, NDUFS8, PPA1]
KEGG:03320	PPAR signaling pathway	KEGG_03.03.2021	0.655582	1	0.888487	1	[-1]	Group49	7.89474	6	[ACSL3, ACSL5, CD36, ME1, SCD5, SCP2]
KEGG:04010	MAPK signaling pathway	KEGG_03.03.2021	0.00719679	1	0.0511955	1	[-1]	Group62	11.2245	33	[AKT2, ANGPT1, ARRB1, ATF2, CACNA1D, CACNA1G, CACNA1I, CACNB2, CACNG2, CDC25B, DUSP10, DUSP4, ERBB4, FGF3, FGFR2, GNA12, GRB2, KRAS, MAP2K4, MAP3K4, MAP4K3, NTRK2, PAK1, PDGFRB, PLA2G4E, PPP3CA, PTPN5, RAPGEF2, RASGRF1, RPS6KA2, SOS1, STK3, TAOK1]
KEGG:04066	HIF-1 signaling pathway	KEGG_03.03.2021	1	1	0.471644	1	[-1]	Group80	6.42202	7	[AKT2, ANGPT1, CAMK2A, CAMK2G, CDKN1A, PFKFB3, SERPINE1]
KEGG:04145	Phagosome	KEGG_03.03.2021	0.42436	1	0.42436	1	[-1]	Group24	8.55263	13	[ACTG1, ATP6V0A4, ATP6V1A, CD36, CLEC7A, EEA1, LAMP2, MSR1, NCF4, NOS1, SCARB1, STX12, TUBA8]
KEGG:04150	mTOR signaling pathway	KEGG_03.03.2021	0.0163625	1	0.281578	1	[-1]	Group56	12.2581	19	[AKT2, ATP6V1A, DEPTOR, GRB2, KRAS, LPIN1, LRP5, PRKAA2, PRR5, RPS6KA2, SLC38A9, SOS1, TSC1, WDR59, WNT10A, WNT6, WNT7A, WNT7B]
KEGG:04151	PI3K-Akt signaling pathway	KEGG_03.03.2021	0.0893649	1	0.00955047	0.735386	[-1]	Group54	9.32203	33	[AKT2, ANGPT1, ATF2, CCND3, CDKN1A, COL1A1, COL4A3, COL4A4, COL6A3, ERBB4, FGF3, FGFR2, GRB2, IL4R, IL7R, ITGA2B, ITGA8, KRAS, LAMA3, LPAR5, MAGI1, MAGI2, NTRK2, PDGFRB, PHLPP2, PIK3AP1, PRKAA2, SGK2, SOS1, SPP1, TSC1, VWF]
KEGG:04152	AMPK signaling pathway	KEGG_03.03.2021	0.365576	1	0.80132	1	[-1]	Group71	9.16667	11	[ACACA, ADIPOR1, AKT2, CD36, CFTR, FASN, PFKFB3, PRKAA2, SCD5, TSC1]
KEGG:04330	Notch signaling pathway	KEGG_03.03.2021	0.306946	1	0.306946	1	[-1]	Group27	10.1695	6	[ATXN1, HEY1, KAT2A, MAML3, NCOR2, TLE4]
KEGG:04610	Complement and coagulation cascades	KEGG_03.03.2021	0.832519	1	0.832519	1	[-1]	Group00	5.88235	5	[CD59, F10, PROS1, SERPINE1, VWF]
KEGG:04611	Platelet activation	KEGG_03.03.2021	0.0192335	1	0.233901	1	[-1]	Group72	12.9032	16	[ACTG1, ADCY2, ADCY8, AKT2, COL1A1, GNAQ, ITGA2B, ITPR2, MYL12A, P2RY12, PLA2G4E, PRKG1, PRKG2, ROCK1, TLN2, VWF]
KEGG:04630	JAK-STAT signaling pathway	KEGG_03.03.2021	0.0876066	1	0.751514	1	[-1]	Group38	10.4938	17	[AKT2, CCND3, CDKN1A, CNTFR, GRB2, IFNE, IFNW1, IL10RB, IL12RB2, IL23R, IL4R, IL7R, LIFR, PDGFRB, PTPN6, SOCS7, SOS1]
KEGG:04640	Hematopoietic cell lineage	KEGG_03.03.2021	0.844492	1	0.844492	1	[-1]	Group02	6.06061	6	[CD36, CD4, CD59, IL4R, IL7R, ITGA2B]
KEGG:04658	Th1 and Th2 cell differentiation	KEGG_03.03.2021	0.836304	1	0.143566	1	[-1]	Group67	7.6087	7	[CD4, IL12RB2, IL4R, MAML3, NFKBIE, PPP3CA, RUNX3]
KEGG:04659	Th17 cell differentiation	KEGG_03.03.2021	0.445983	1	0.143566	1	[-1]	Group67	4.6729	5	[CD4, IL23R, IL4R, NFKBIE, PPP3CA]
KEGG:04660	T cell receptor signaling pathway	KEGG_03.03.2021	0.330131	1	0.143566	1	[-1]	Group67	9.61539	10	[AKT2, CD4, GRB2, KRAS, NFKBIE, PAK1, PPP3CA, PTPN6, PTPRC, SOS1]
KEGG:04660	T cell receptor signaling pathway	KEGG_03.03.2021	0.330131	1	0.471644	1	[-1]	Group80	9.61539	10	[AKT2, CD4, GRB2, KRAS, NFKBIE, PAK1, PPP3CA, PTPN6, PTPRC, SOS1]
KEGG:04662	B cell receptor signaling pathway	KEGG_03.03.2021	0.379912	1	0.143566	1	[-1]	Group67	9.7561	8	[AKT2, GRB2, KRAS, NFKBIE, PIK3AP1, PPP3CA, PTPN6, SOS1]
KEGG:04666	Fc gamma R-mediated phagocytosis	KEGG_03.03.2021	0.225845	1	0.225845	1	[-1]	Group03	10.3093	10	[ACTR3C, AKT2, DOCK1, GAB2, PAK1, PLA2G4E, PRKCE, PTPRC, SCIN, WASF3]
KEGG:04668	TNF signaling pathway	KEGG_03.03.2021	0.353933	1	0.205594	1	[-1]	Group48	4.46429	5	[AKT2, ATF2, MAP2K4, TRAF1, TRAF5]
KEGG:04750	Inflammatory mediator regulation of TRP channels	KEGG_03.03.2021	0.688745	1	0.471644	1	[-1]	Group80	8.16327	8	[ADCY2, ADCY8, CAMK2A, CAMK2G, GNAQ, ITPR2, PLA2G4E, PRKCE]

## Sheet: List_of_candidate_genes
Candidate genes
AACS
AARS2
AATF
ABAT
ABCC1
ABCC2
ABCD3
ABCG4
ACACA
ACAD10
ACCS
ACO1
ACO2
ACOT11
ACSF2
ACSL3
ACSL5
ACTG1
ACTR3C
ADAMTS13
ADAMTS7
ADCY2
ADCY8
ADCYAP1R1
ADD1
ADGRL2
ADIPOR1
ADORA3
ADSL
AGBL4
AGL
AGR2
AIFM1
AIG1
AK4
AKAP6
AKT2
ALDH1A3
ALYREF
ANGPT1
ANKS4B
ANO1
AP1S3
APBB1
APC
ARHGAP12
ARHGEF6
ARID5B
ARMT1
ARRB1
ARSB
ASAH2B
ASPA
ATF2
ATG16L2
ATP11A
ATP5MC3
ATP6V0A4
ATP6V1A
ATR
ATRN
ATXN1
AUH
AVP
BACH2
BAG3
BAIAP2L1
BANK1
BBS2
BCAT1
BMP2K
BPHL
BPNT1
BTRC
C12orf49
C1RL
CACNA1D
CACNA1G
CACNA1I
CACNB2
CACNG2
CALCOCO2
CAMK2A
CAMK2G
CAPN3
CAVIN3
CCDC88B
CCND3
CCR1
CCR7
CCS
CCT2
CCT8
CD300H
CD300LD
CD36
CD4
CD47
CD59
CD83
CDC25B
CDC42BPA
CDH3
CDKN1A
CDKN2AIP
CEMIP
CERS6
CFP
CFTR
CHIA
CHMP6
CHORDC1
CIT
CLEC16A
CLEC5A
CLEC7A
CLNK
CNKSR3
CNOT7
CNTFR
CNTN1
COL1A1
COL4A3
COL4A4
COL6A3
COMMD3-BMI1
COX7B
CPPED1
CRYM
CSNK1A1
CSRP3
CTNS
CTPS1
CTPS2
CXADR
CYBC1
CYP7B1
DAG1
DCLRE1A
DCLRE1B
DDX3X
DEGS1
DEPTOR
DGKB
DGKH
DGKI
DHX15
DLC1
DLG5
DMD
DNAJB6
DNAJC2
DOCK1
DOCK10
DOCK8
DOCK9
DOK5
DONSON
DPYD
DUOX2
DUOXA2
DUSP10
DUSP14
DUSP4
DYSF
ECPAS
EEA1
EFHC2
EIF3B
ELMO2
ELOVL4
ELOVL5
EML1
EMSY
ENG
ENTPD7
EPAS1
EPCAM
EPHA4
EPHB1
EPHB6
ERBB4
ERCC4
ESCO2
ESR1
ETV6
EYA2
F10
F11R
FA2H
FAM168A
FAM83D
FANCM
FARSB
FASN
FBXO31
FBXO38
FGF13
FGF3
FGFR2
FGL1
FKBP4
FNTA
FOLH1B
FOLR2
FOSL1
FOXK2
FOXN1
FOXN3
FRMD8
FRS2
FTO
FUCA2
GAB2
GABRA5
GART
GCLM
GDF6
GFI1B
GFRA4
GLP2R
GNA12
GNAQ
GPAM
GPATCH3
GPC1
GPC3
GPM6A
GPR83
GRB2
GREM1
GRK7
GRM1
GYG1
HADH
HAO2
HAVCR1
HDAC9
HEY1
HGFAC
HIBCH
HMGN1
HSD17B12
HTR4
HVCN1
IDH3G
IFFO1
IFNE
IFNW1
IL10RB
IL12RB2
IL17B
IL23R
IL4R
IL7R
INSIG2
IST1
ITFG2
ITGA2B
ITGA8
ITPR2
JARID2
JMJD1C
KAT2A
KCMF1
KCNK2
KDM5B
KLRD1
KLRK1
KMO
KMT2C
KPNA3
KRAS
KSR1
LAMA3
LAMP2
LAPTM4B
LARS2
LDB2
LIFR
LIMD1
LIPI
LNX1
LONP2
LOXL1
LPAR5
LPIN1
LRIG2
LRP5
LRRC32
LRRC8C
LRRK1
LYAR
MAD2L2
MAGI1
MAGI2
MAGI3
MAML3
MAOB
MAP2K4
MAP3K4
MAP4K3
MAPK4
MARK1
MAVS
MBP
MDH1
ME1
MEF2A
MEIS1
MGAT5
MMP12
MMRN1
MMS22L
MORC1
MORC3
MPP2
MSMP
MSR1
MTHFD1L
MTHFS
MTM1
MTR
MTUS1
MYH9
MYL12A
MYO7A
MYSM1
N4BP1
NAALAD2
NAPEPLD
NARS2
NCF4
NCOR2
NDC1
NDUFA1
NDUFC2
NDUFS8
NECTIN4
NEIL1
NFKBIE
NFYB
NHEJ1
NKAP
NLRX1
NOS1
NOX3
NPC1
NPLOC4
NRBF2
NSMCE2
NTRK2
NTRK3
NUB1
NUP54
NUP85
OBSCN
ODC1
OPRM1
OSBPL1A
OSBPL3
OTC
OTOP1
OTUB2
P2RY12
PAAF1
PACRG
PAK1
PANK2
PAQR3
PARP1
PARPBP
PARS2
PAX6
PC
PCCA
PDE4B
PDGFRB
PDIK1L
PFKFB3
PGM3
PHLPP2
PIANP
PIK3AP1
PKHD1
PLA2G4E
PLAGL1
PLCL2
PLEKHM2
PLPP4
PMM1
PMS1
PNKD
POLB
POLR3A
POLR3H
POMT2
POT1
PPA1
PPARGC1B
PPEF2
PPM1L
PPP3CA
PRDM11
PRKAA2
PRKCE
PRKDC
PRKG1
PRKG2
PROS1
PRPF4B
PRR5
PRR5L
PSMB2
PSMB6
PSMB9
PTGFR
PTPN12
PTPN3
PTPN5
PTPN6
PTPRB
PTPRC
PURB
QDPR
RAB1B
RAB37
RACGAP1
RAD51B
RALB
RAP2A
RAPGEF2
RASGRF1
RBBP7
RBFOX2
RCAN1
RCAN3
RCSD1
RET
RFC3
RFTN1
RGL1
RIN3
RNASEH2B
RNF13
RNF19B
RNF216
RNFT2
ROCK1
ROR1
RPS6KA2
RSF1
RTN4R
RUNX2
RUNX3
RWDD3
RXFP1
SAXO1
SCAMP1
SCARB1
SCD5
SCIN
SCP2
SEMA4D
SEMA5A
SEPTIN6
SERP2
SERPINE1
SGK2
SH2B3
SH3PXD2A
SLC12A2
SLC25A21
SLC26A2
SLC30A10
SLC38A9
SLC39A8
SLC9A3R1
SLIT1
SMYD2
SND1
SNX27
SOCS7
SOS1
SP3
SPAG9
SPINK5
SPP1
SRPX
SSBP3
ST6GALNAC3
STK26
STK3
STK33
STX12
STX8
STXBP1
SUCLA2
SUCNR1
SUSD4
SYCP2
SYT7
SZT2
TADA2A
TAFA4
TAOK1
TAT
TCF7L2
TDG
TENT2
TENT4A
TERF1
TESK2
TIAM1
TJP1
TKFC
TLE4
TLN2
TMBIM6
TMEM109
TMEM131L
TMEM189
TMTC4
TNFAIP8L3
TNRC6B
TNRC6C
TOP1
TP63
TPD52L1
TRAF1
TRAF5
TRBC1
TRIM25
TRIM44
TRIM62
TRIM64B
TRIM77
TRPC6
TSC1
TTC4
TTK
TUBA8
TUSC3
TXN2
TYR
TYRO3
TYSND1
UBA6
UBE2J1
UBE2NL
UBE2T
UBE4B
UCP2
UGGT2
UMODL1
UNC93B1
UPP1
UROC1
USP16
USP43
USP46
USP6NL
VIPR2
VPS13C
VPS37A
VPS37C
VPS45
VTCN1
VWF
WASF3
WASL
WDR35
WDR59
WDTC1
WNK2
WNT10A
WNT6
WNT7A
WNT7B
WWP2
WWTR1
XRCC6
ZADH2
ZBTB38
ZFAND6
ZMYND11
ZNF335
ZNF367
ZYX

## Sheet: Legend
GOID	GOID. Gene Ontology (GO) Identification Number.
GOTerm	GO Term. Gene Ontology (GO) description.
Ontology Source	Ontology Source.
Term PValue	Term significance (PValue).
Term PValue Corrected with Bonferroni step down	Term significance (corrected PValue).
Group PValue	Group significance (PValue).
Group PValue Corrected with Bonferroni step down	Group significance (corrected PValue).
GOLevels	GO levels. Due to the complex structure of GO tree (directed acyclic graph), the GO terms can be placed in several levels. In case of using sources without hierarchical structure (KEGG, BioCarta), the level it is assigned as -1.
GOGroups	The group or the groups that include the term.
% Associated Genes	The percentage of the genes from the uploaded cluster that were associated with the term, compared with all the genes associated with the term.
Nr. Genes	The number the genes from the uploaded cluster that were associated with the term.
Associated Genes Found	The genes from the uploaded cluster that were associated with the term.
